# Supplementary material for: Iron complexation by biomass model compounds
Source: Royal Society of Chemistry journal article supplement (doi:10.1039/d3va00383c), 2024-01-01
Supplement: d3va00383c2.pdf [file d3va00383c2.pdf]

## Supplementary

In general, the figures follow the order of: (1) absorption curves, fractional occupancy curves, and Hill plot

### Myricetin-Fe(II) Chelation

Replicate 1

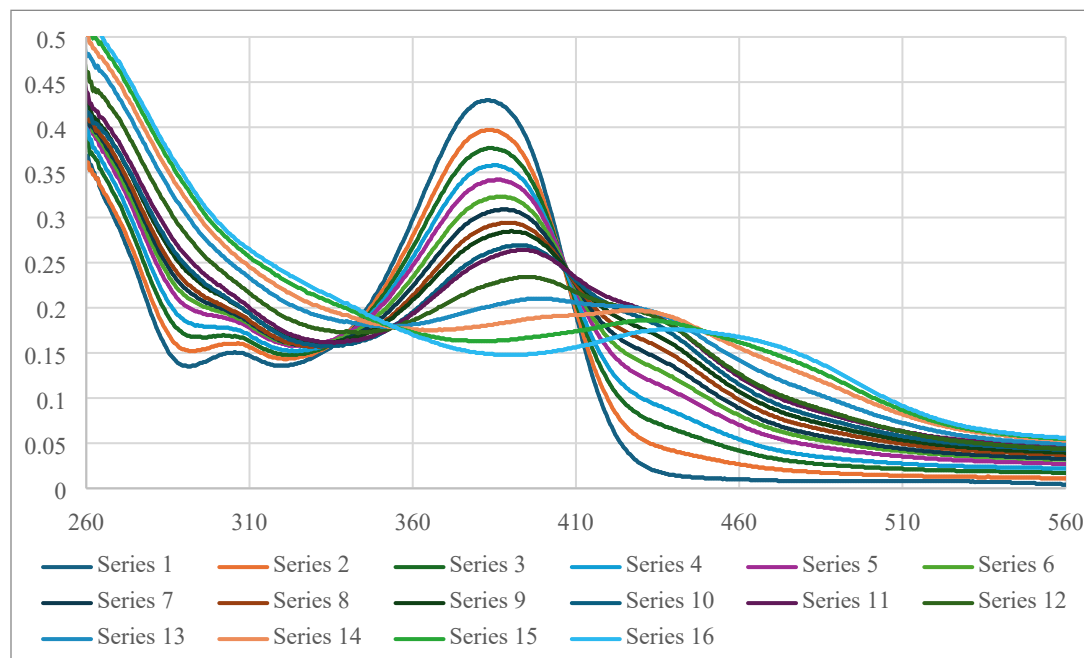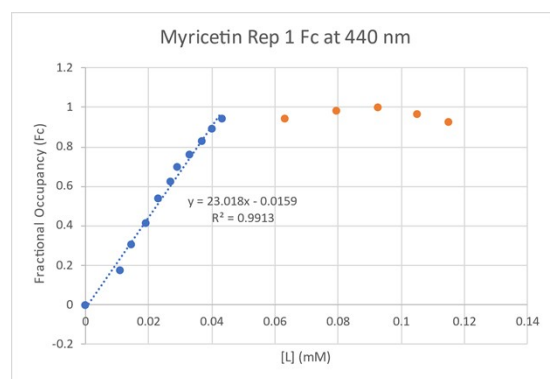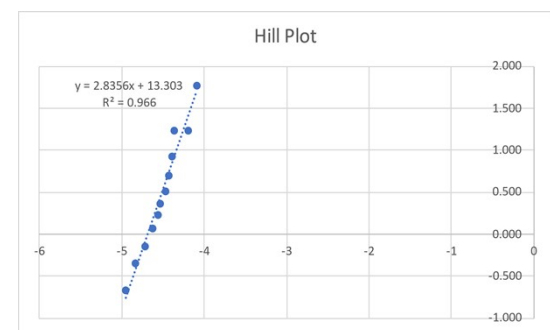

Replicate 2

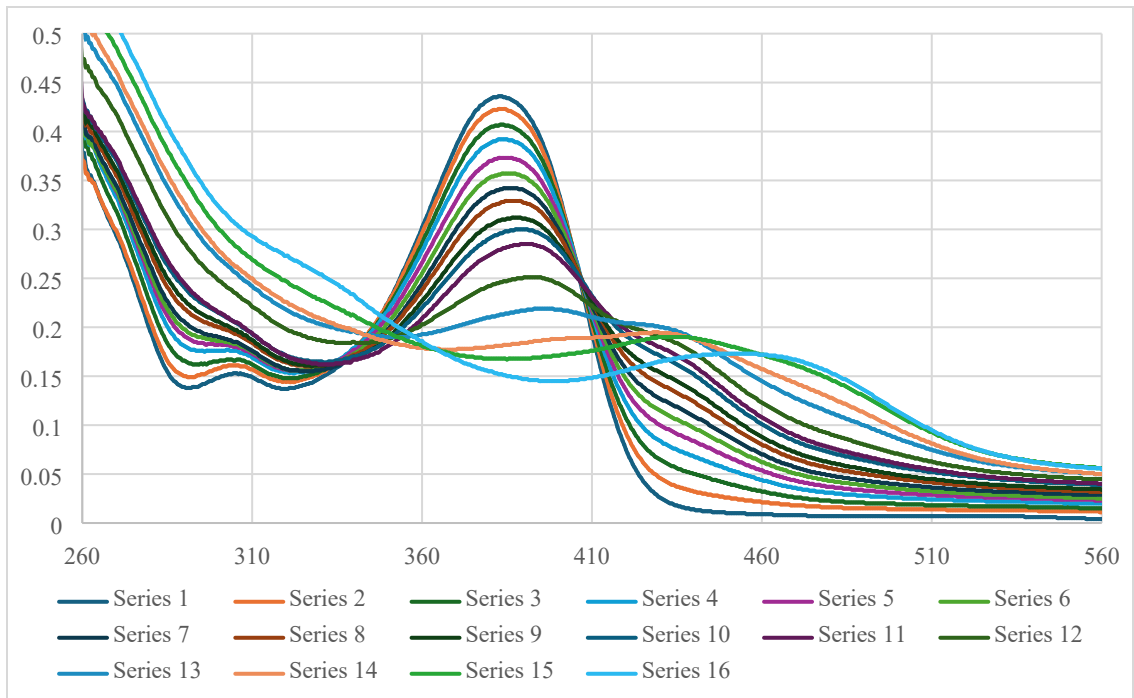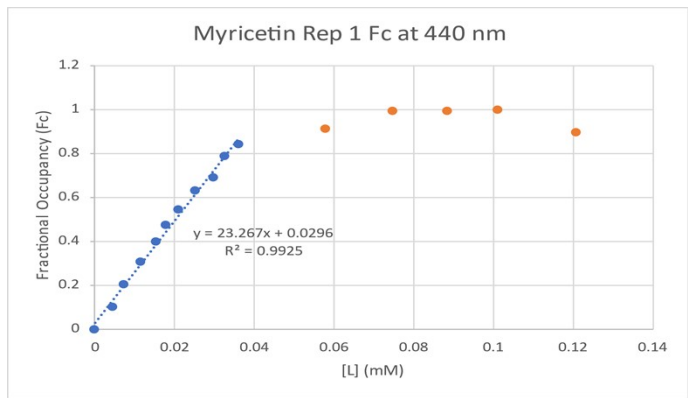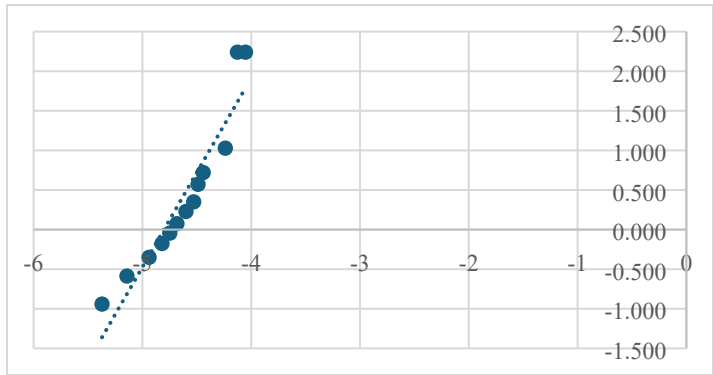

**Myricetin – Fe(III) chelation**

### Replicate 1

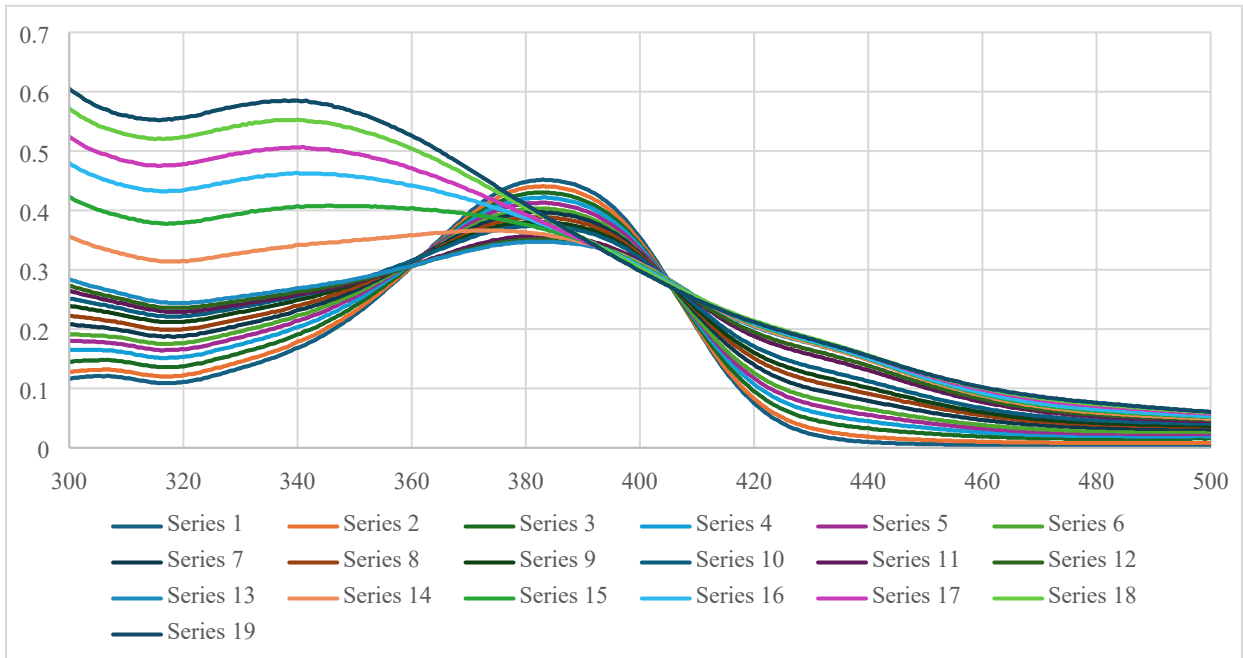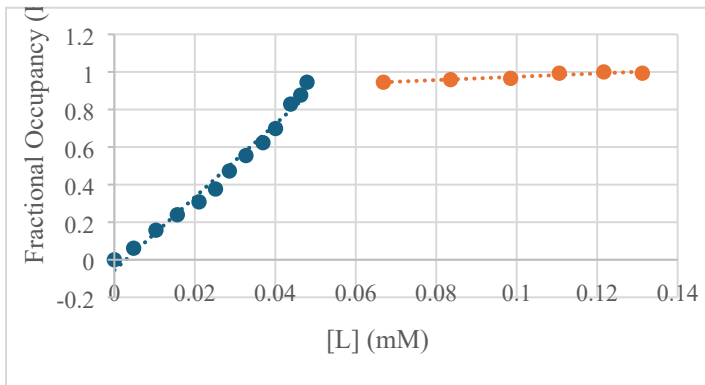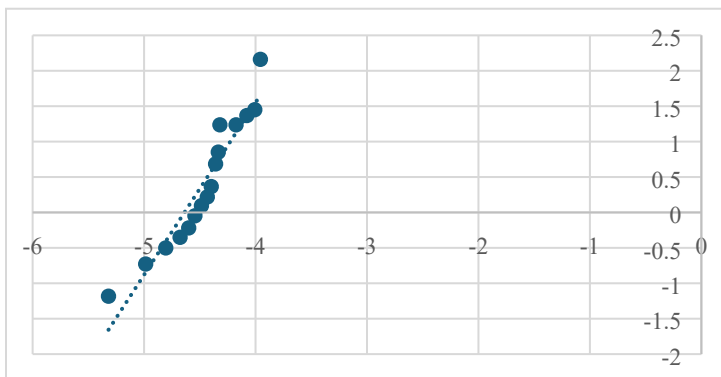

### Replicate 2

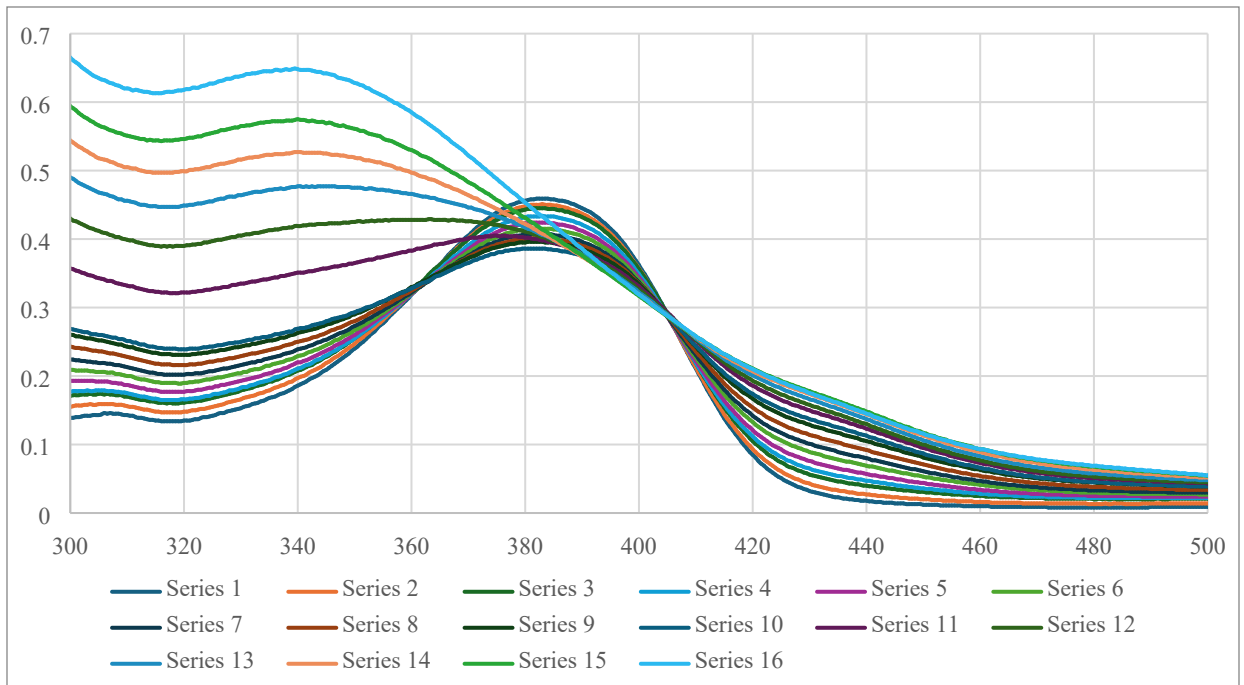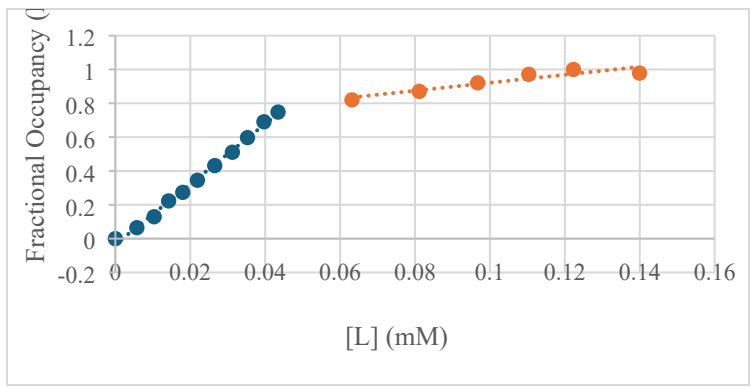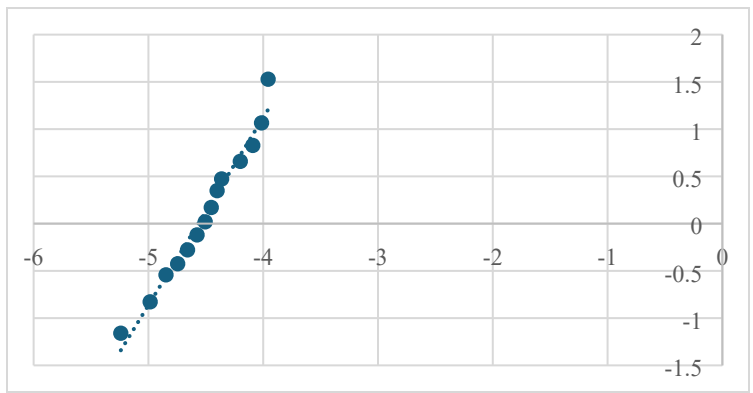

Replicate 3

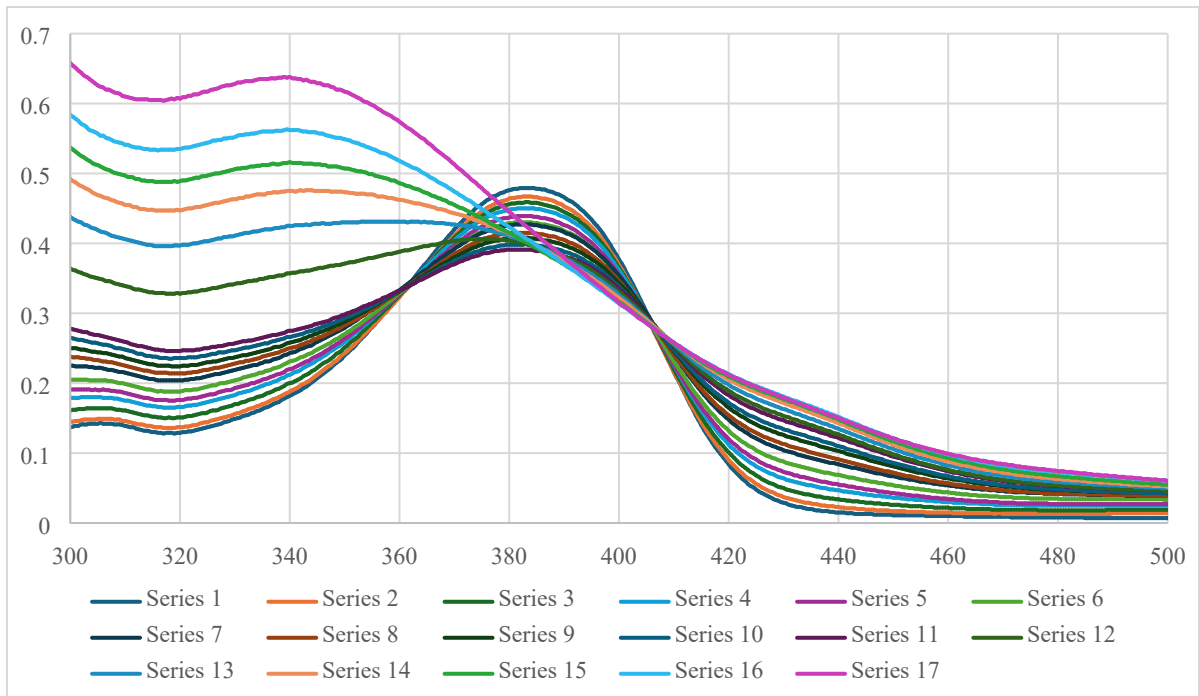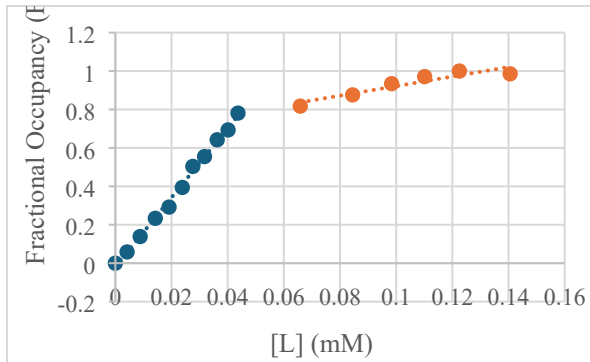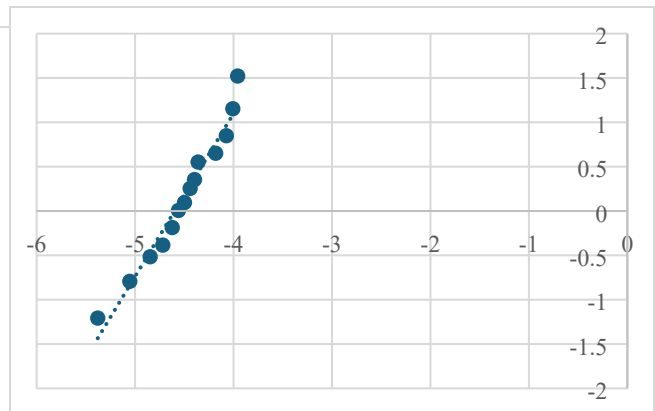

**Quercetin – Fe(II) Chelation**

Replicate 1

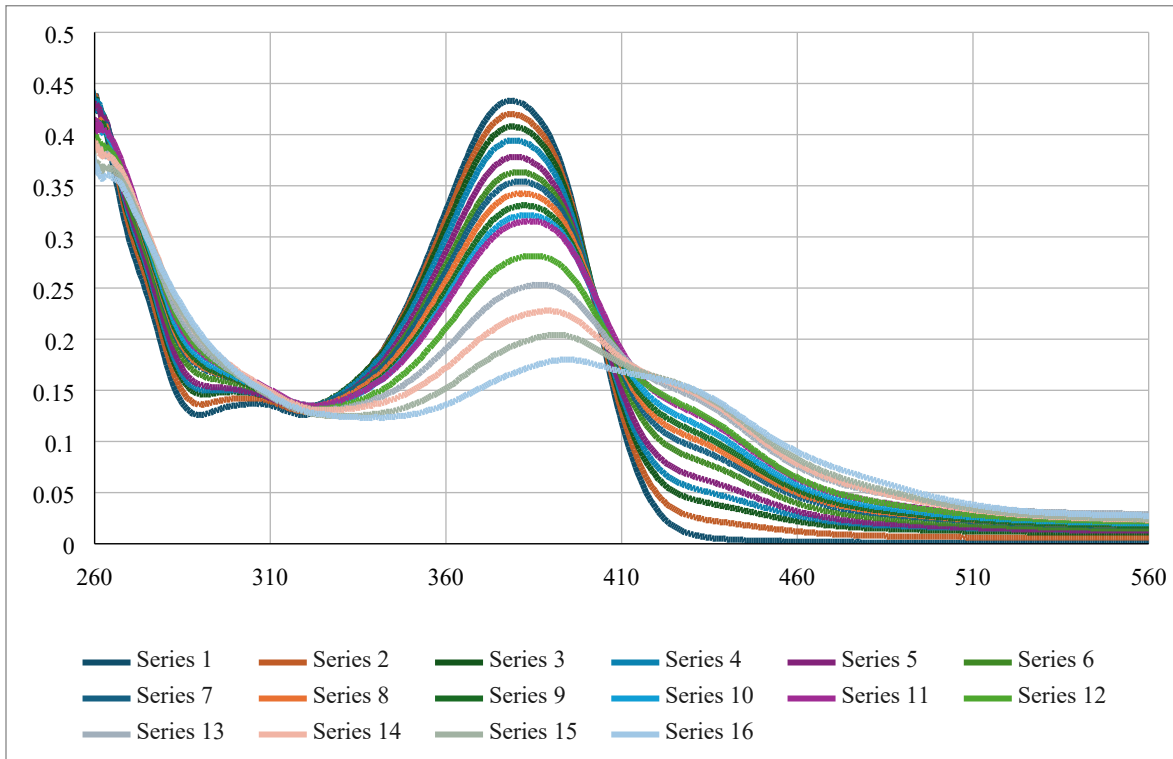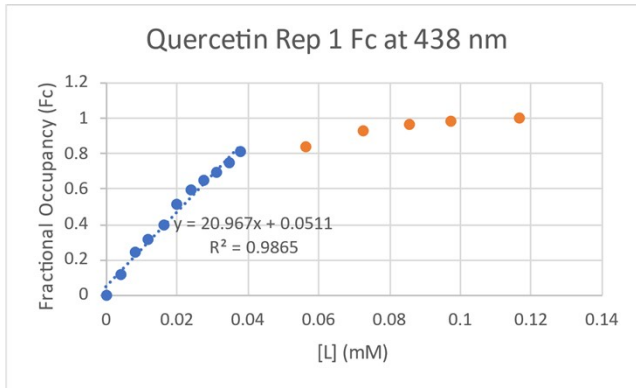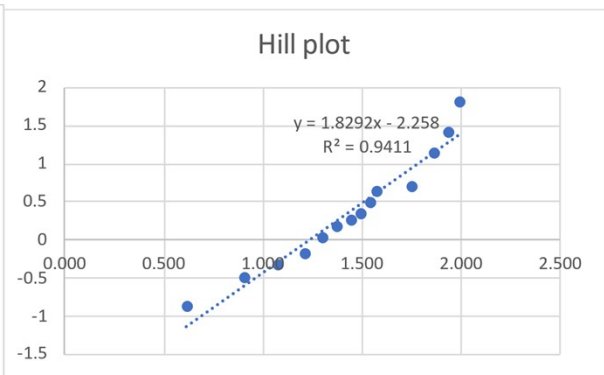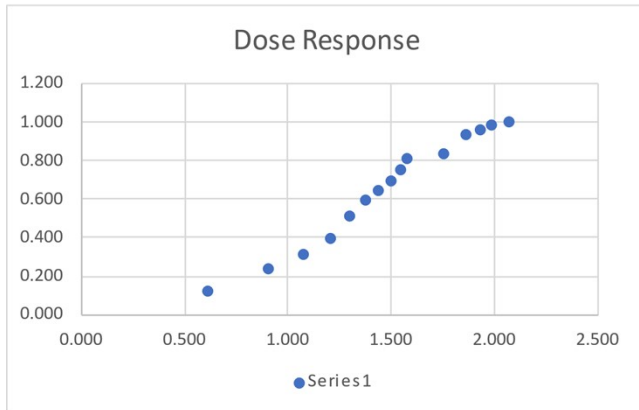

Replicate 2

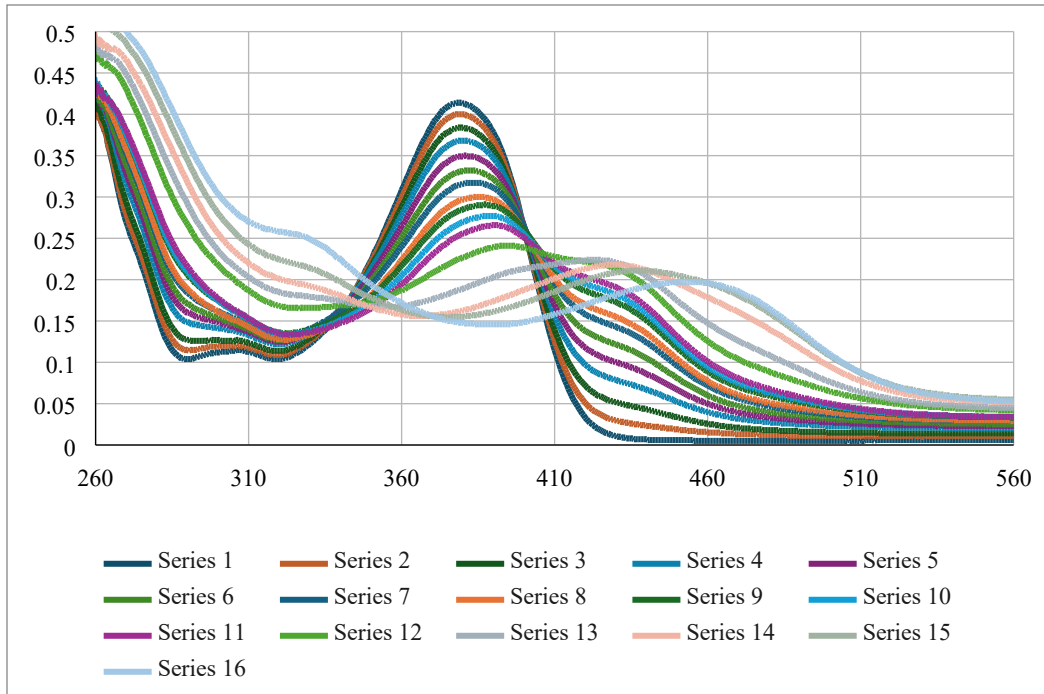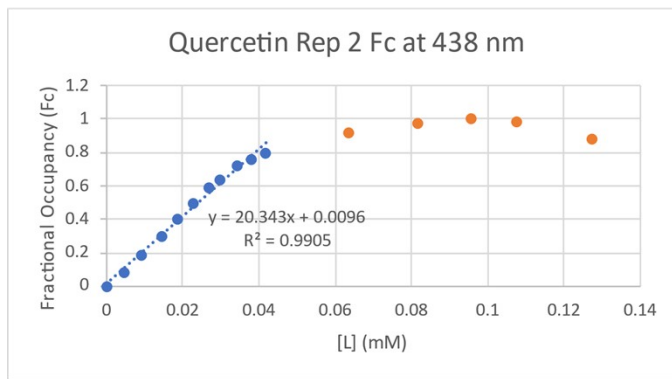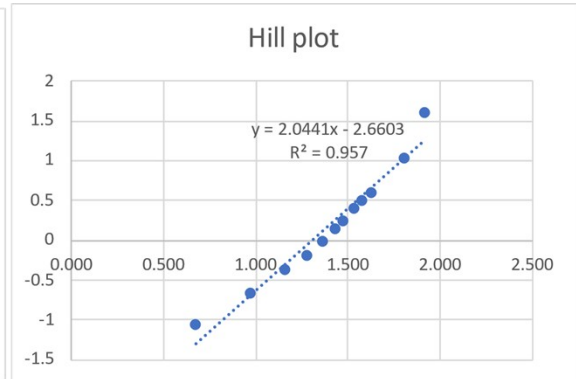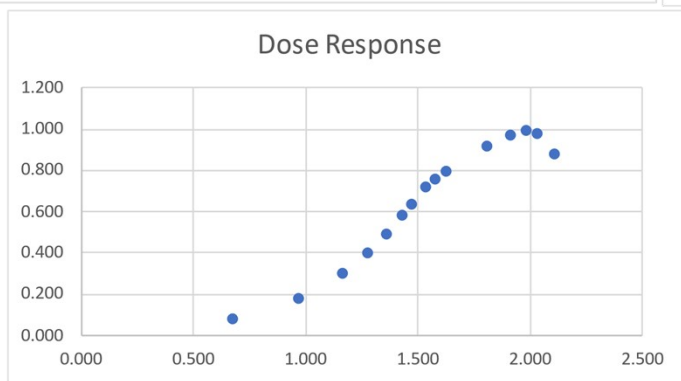

Replicate 3

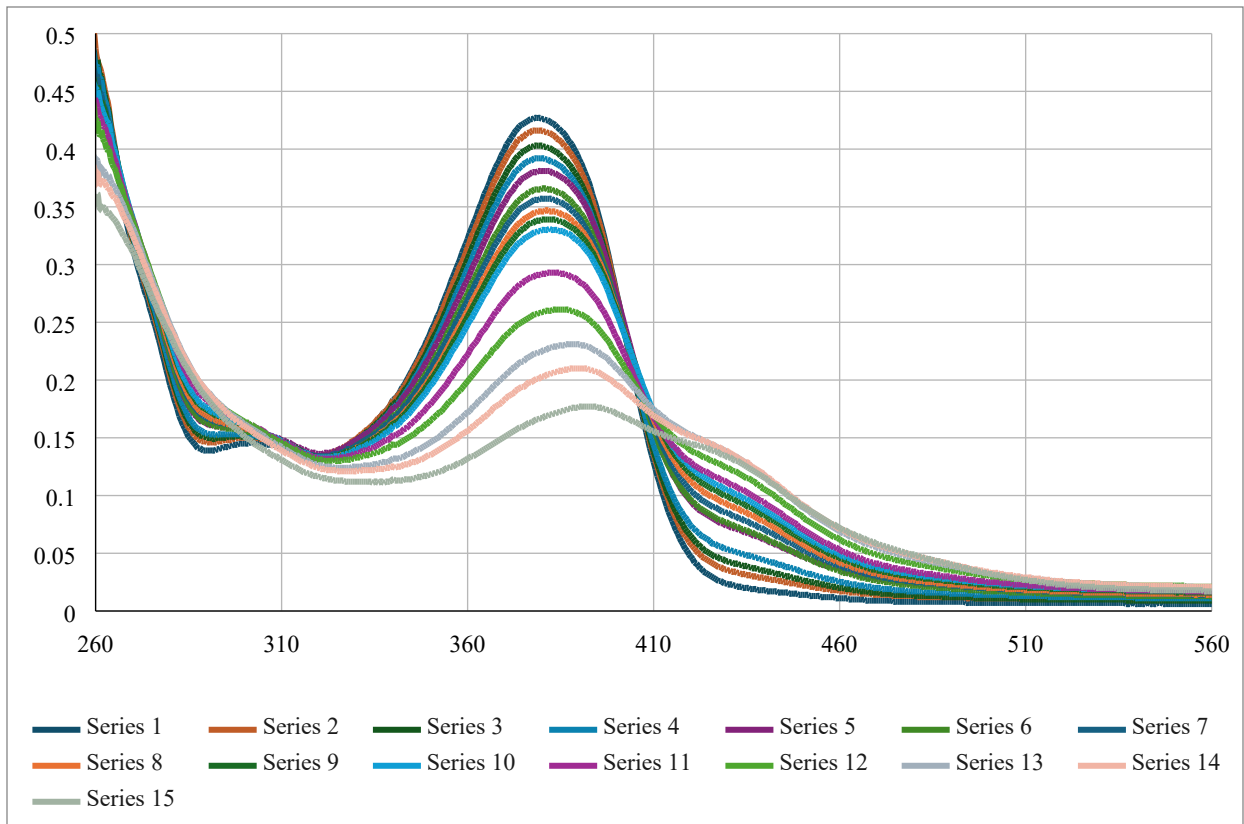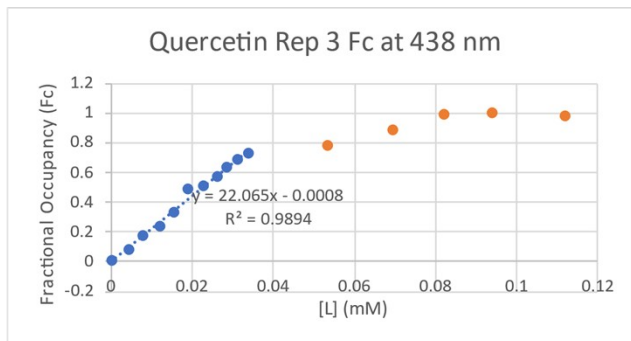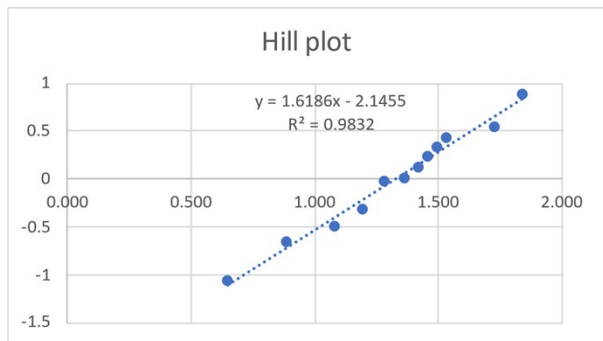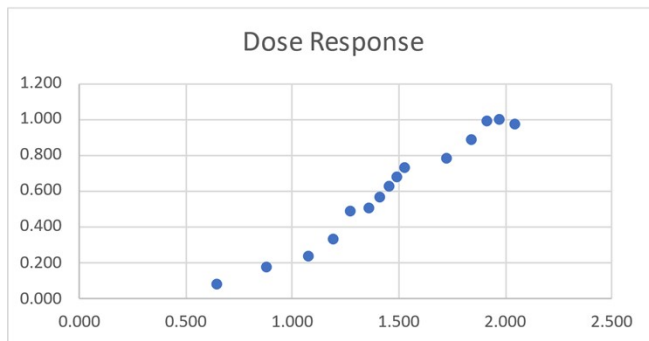

**Quercetin – Fe(III) Chelation**



### Replicate 1

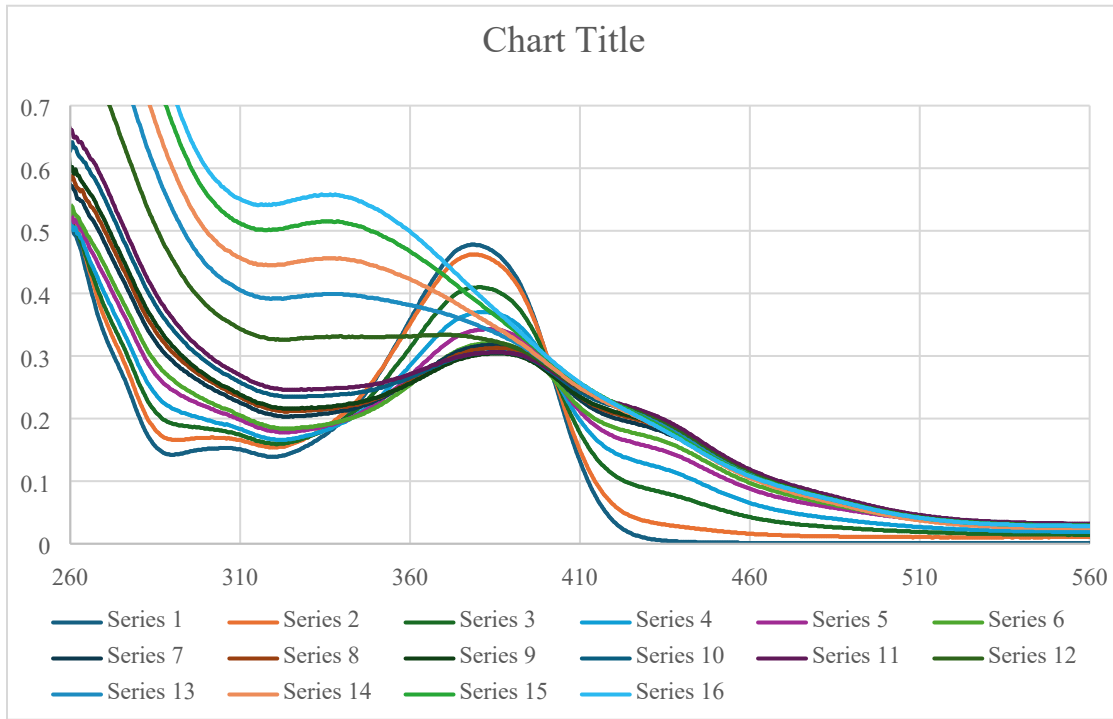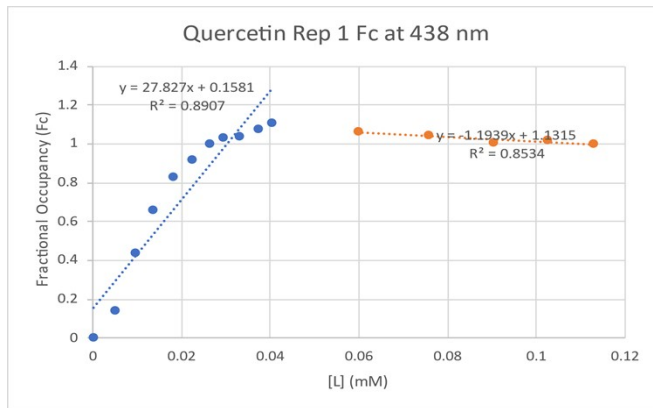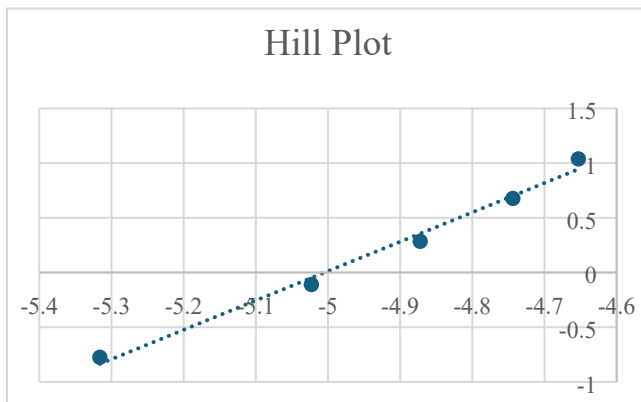

### Replicate 2

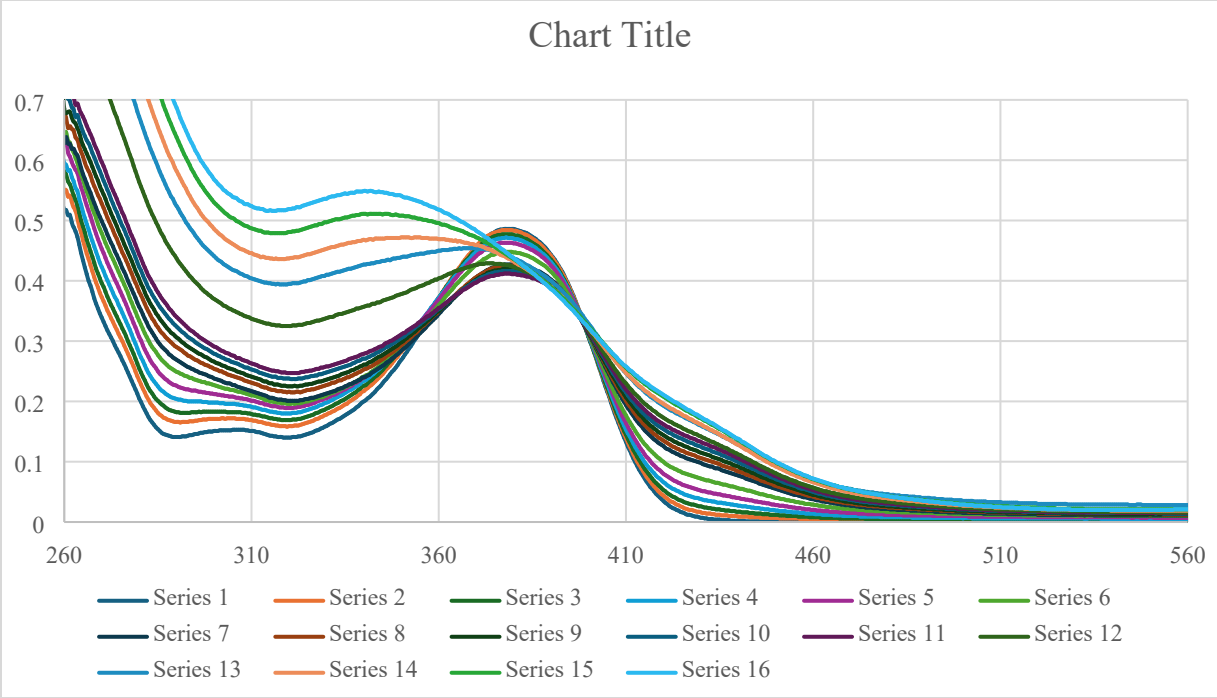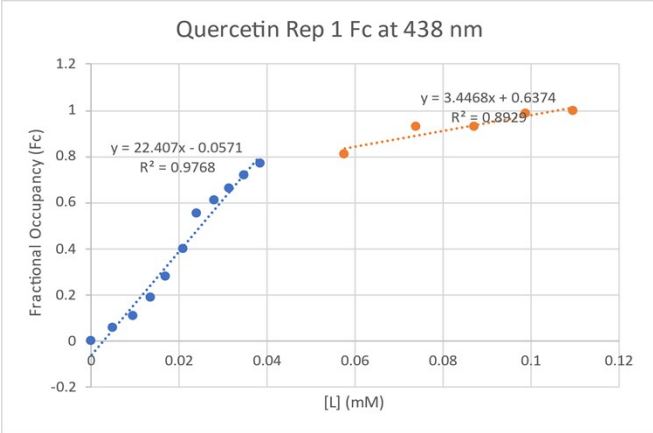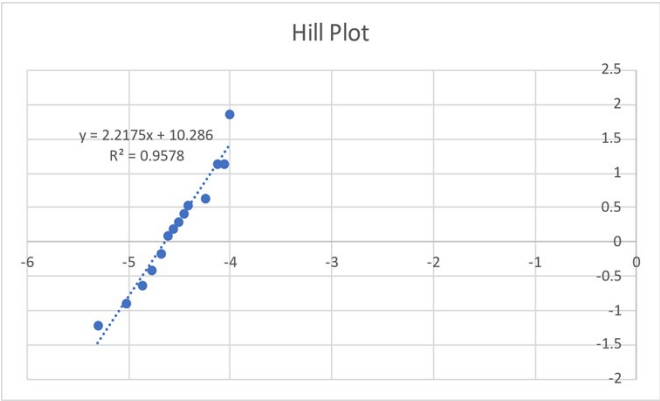

Replicate 3

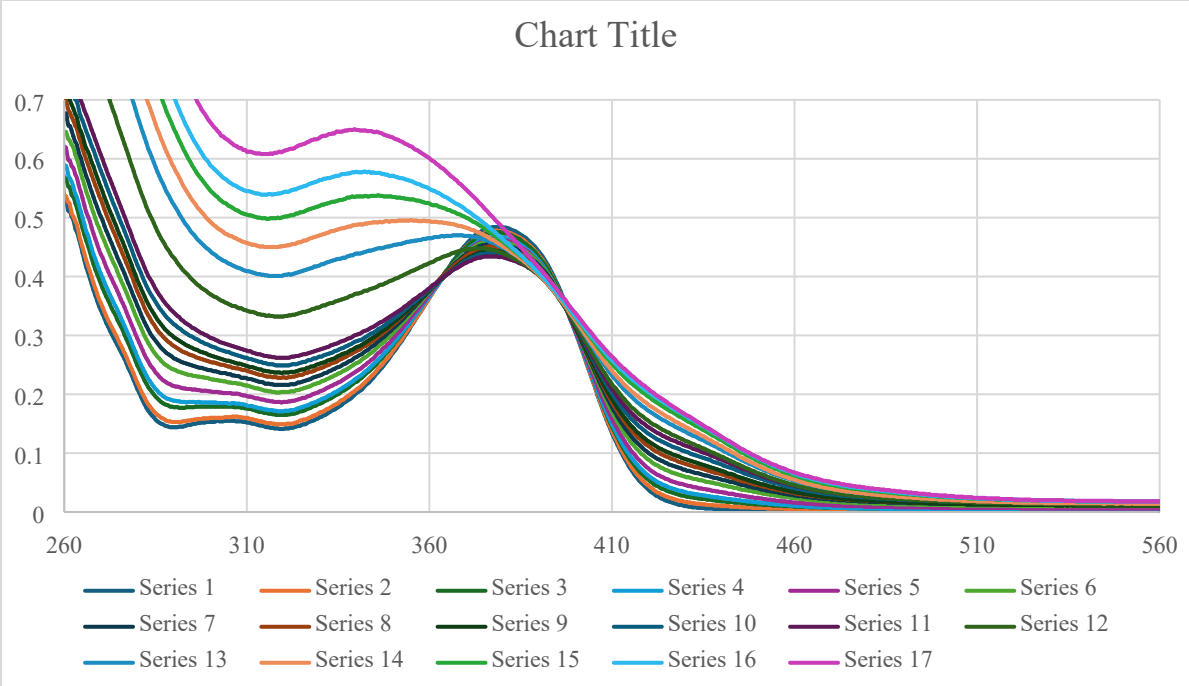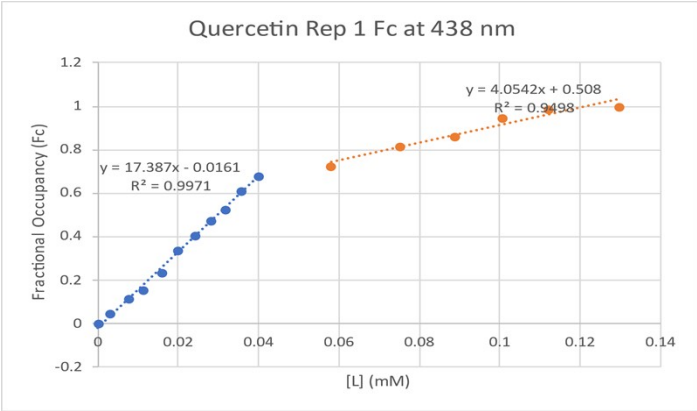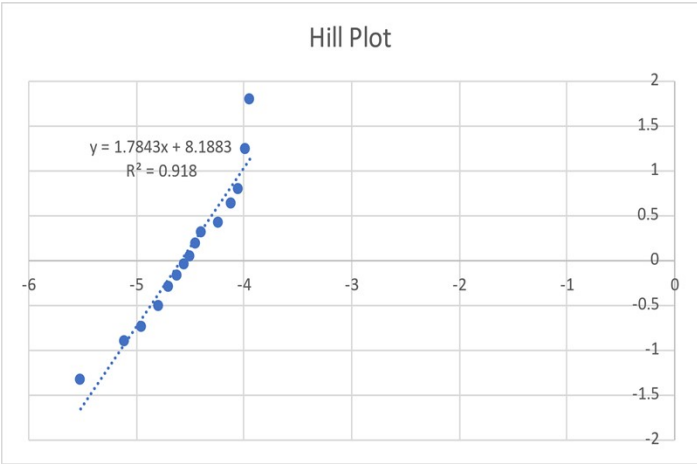

**Kaempferol – Fe(II) chelation**

### Replicate 1

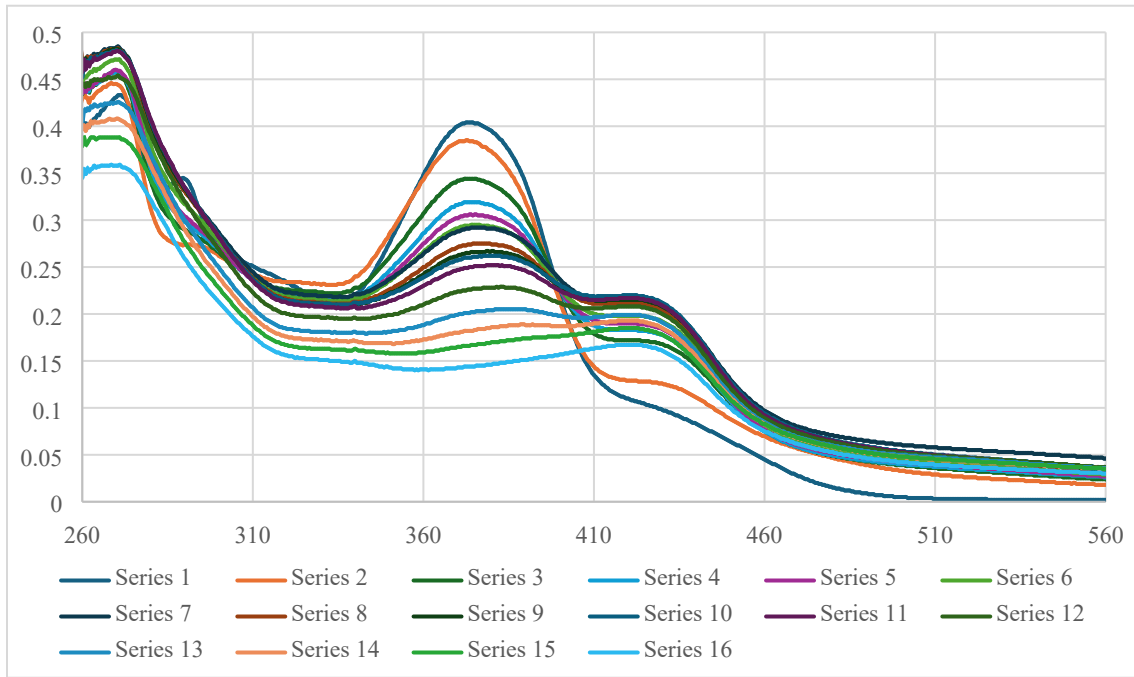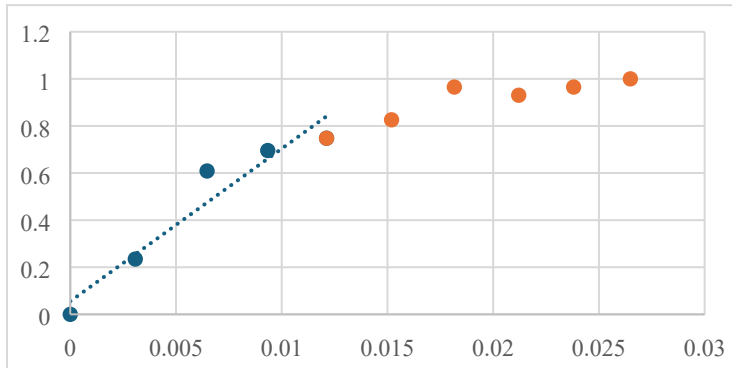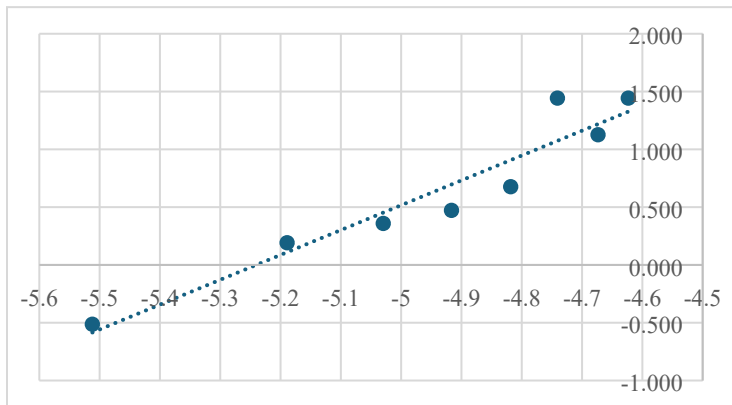

### Replicate 2

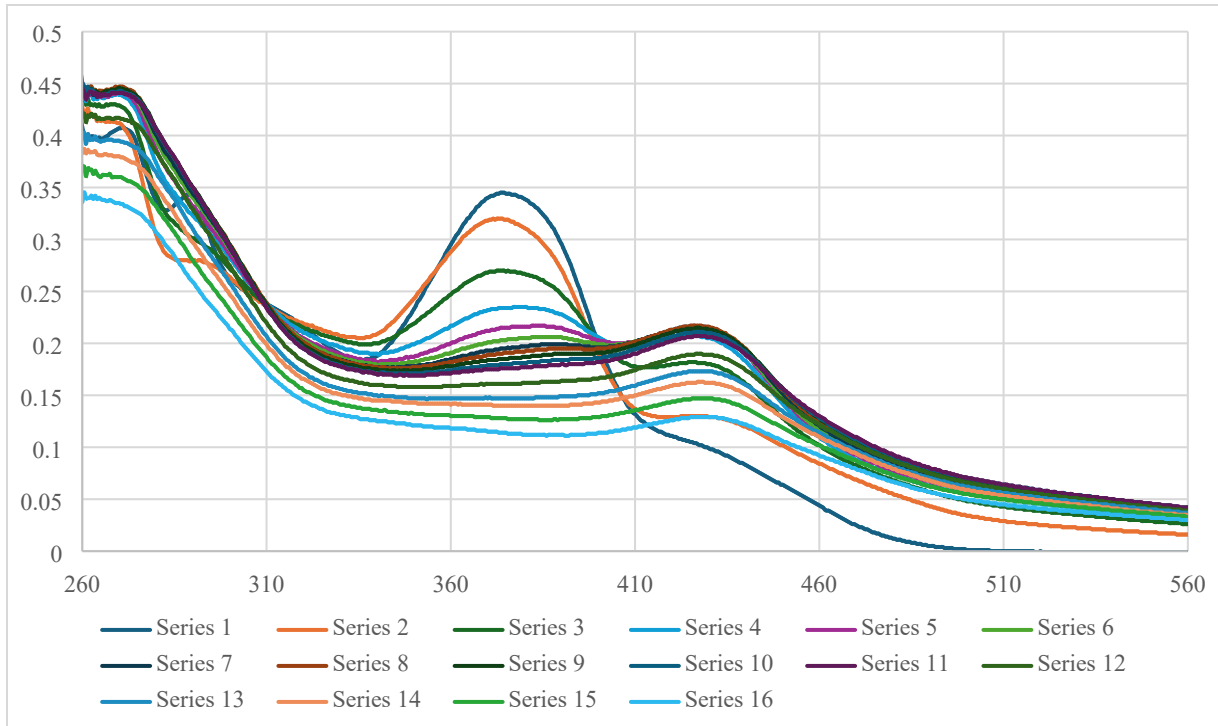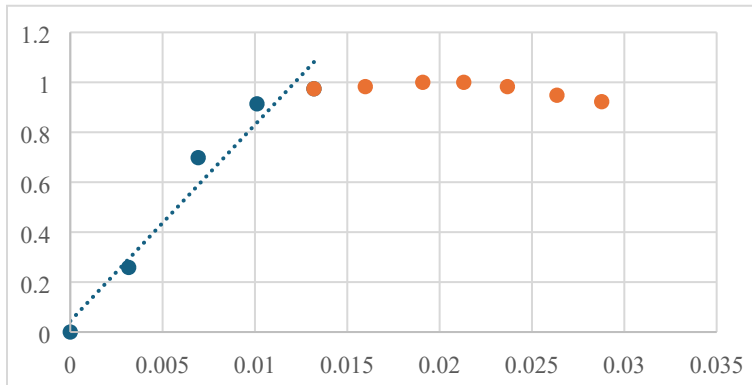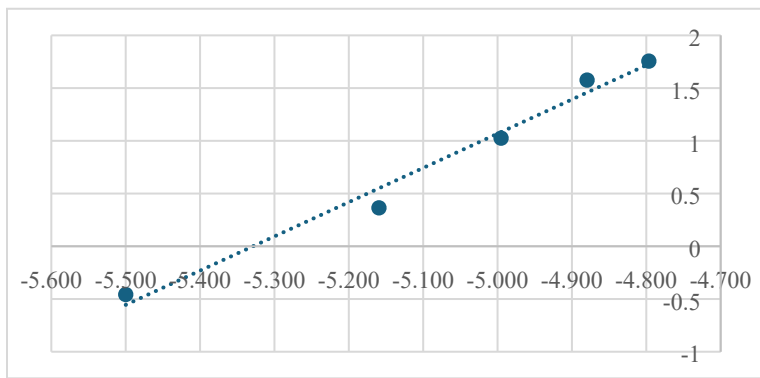

Replicate 3

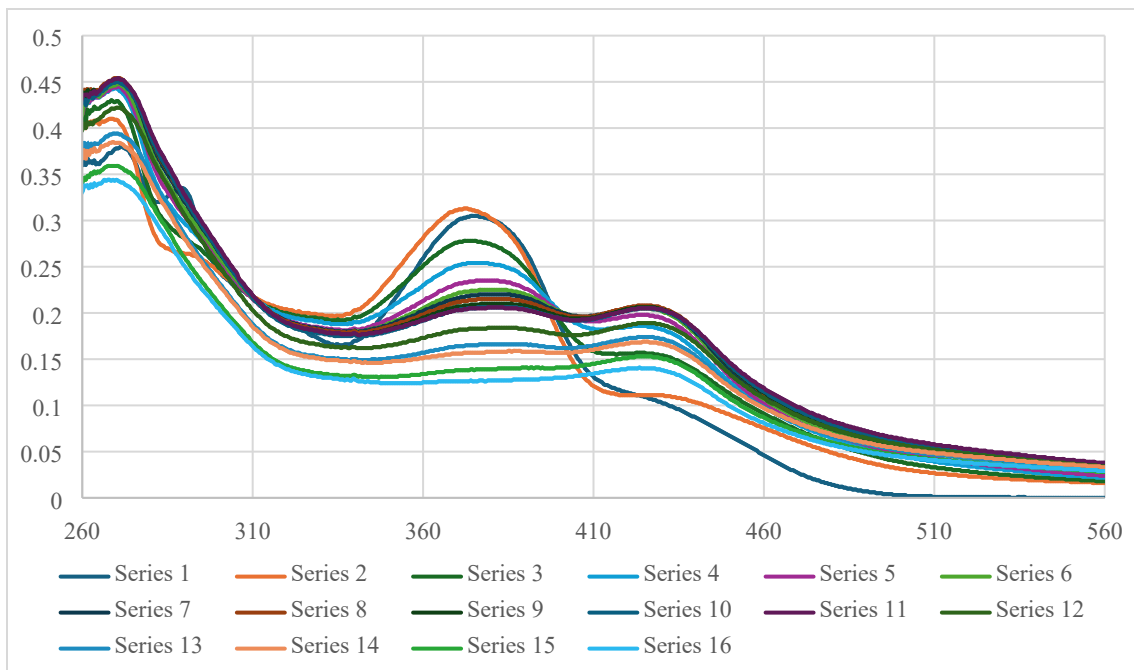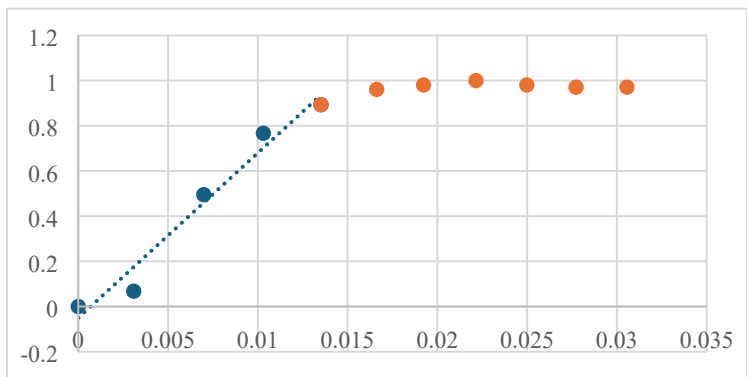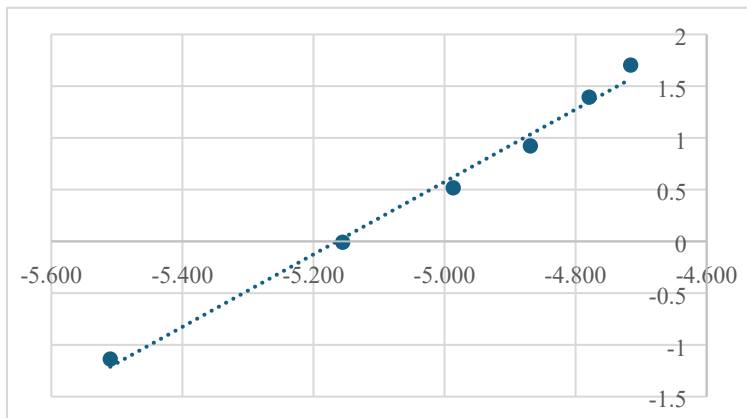

**Kaempferol – Fe(III) chelation**

### Replicate 1

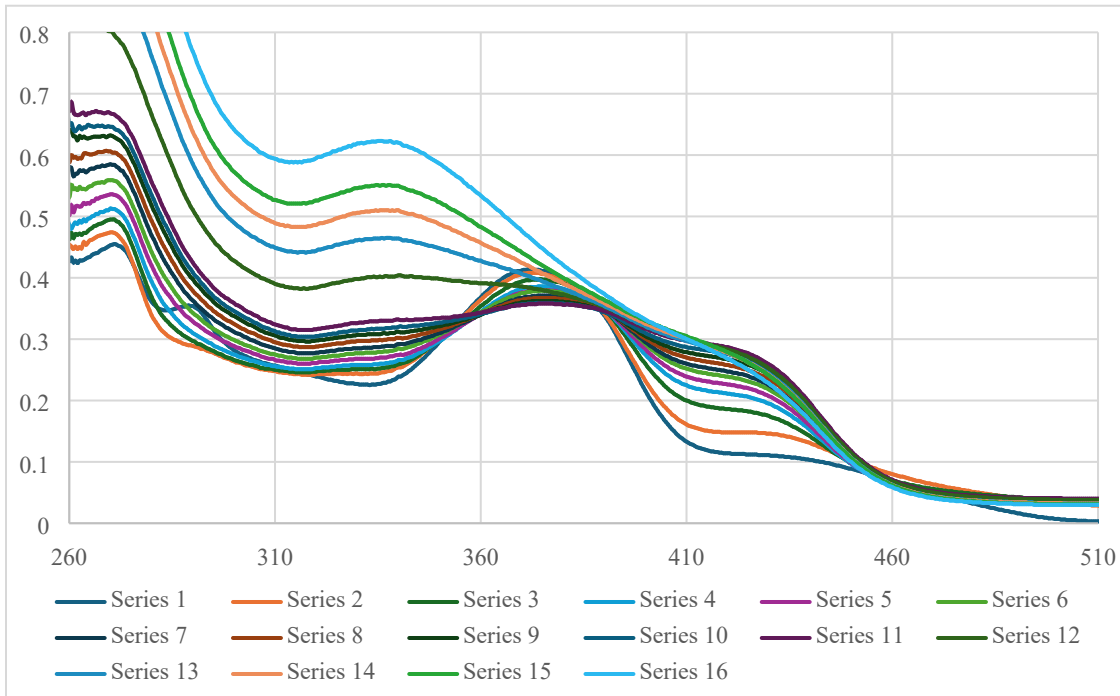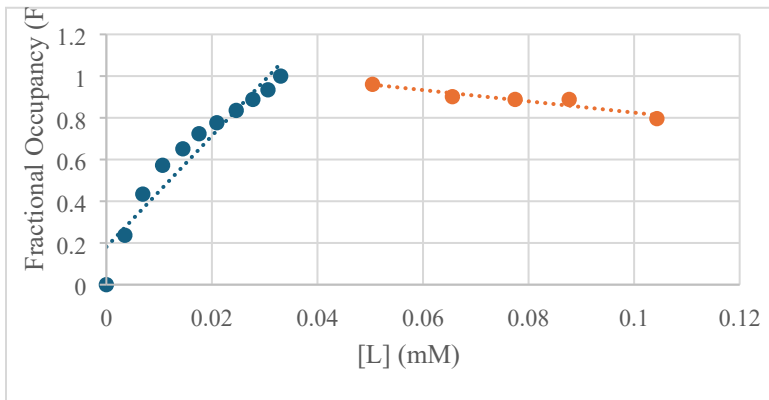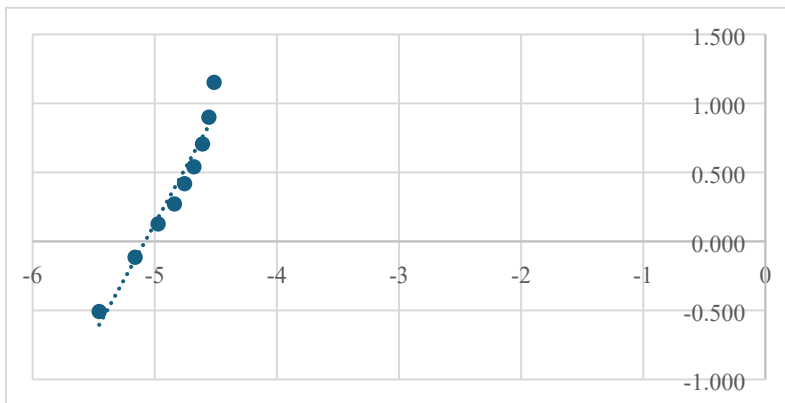

### Replicate 2

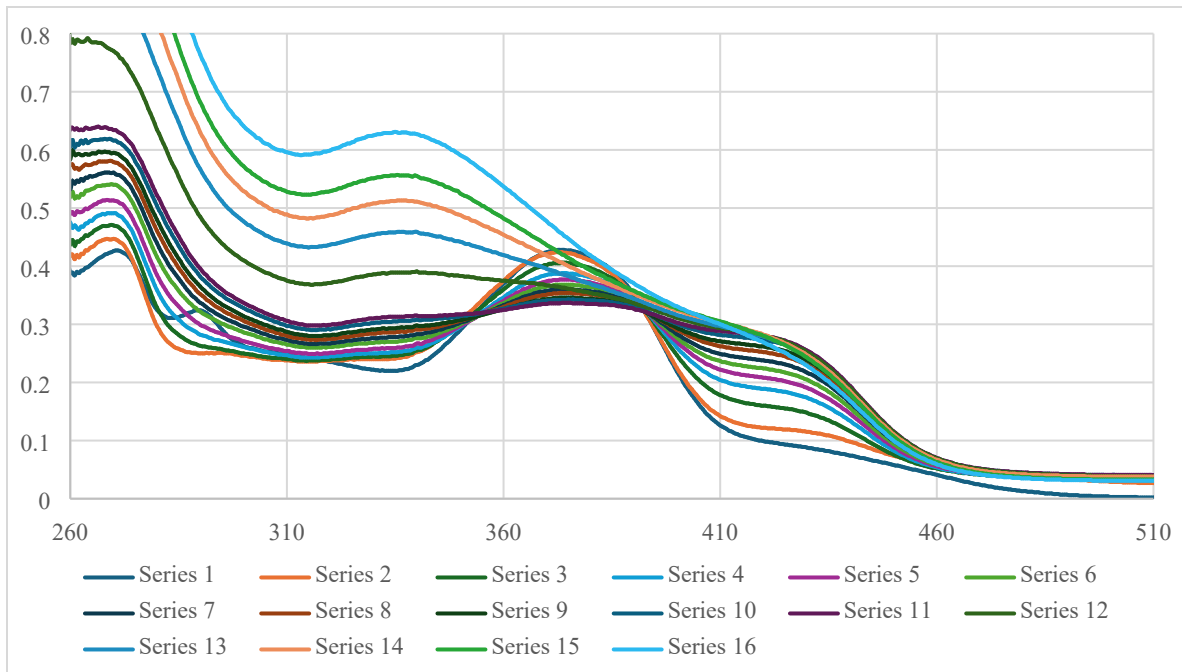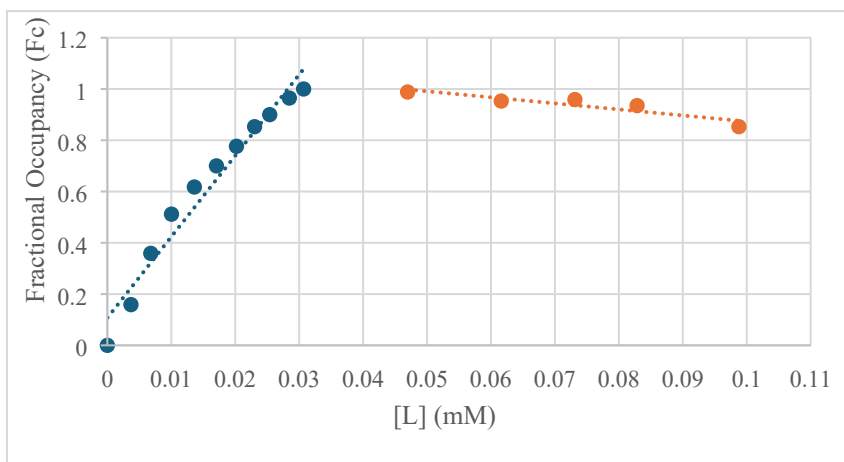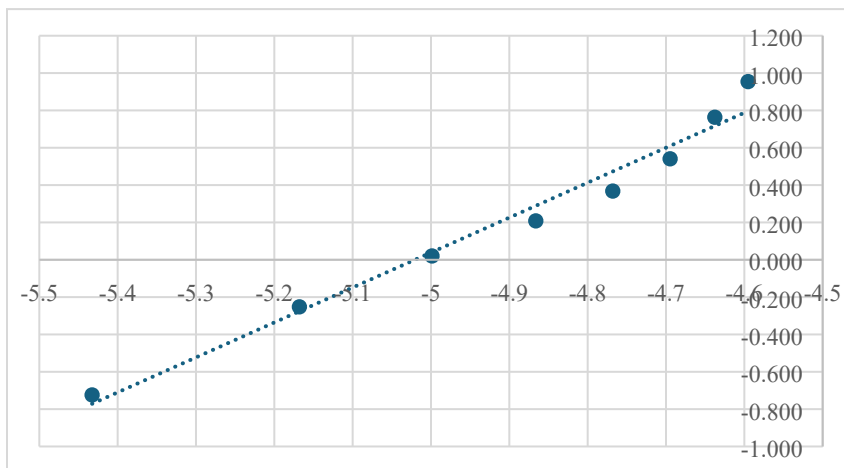



### Replicate 3

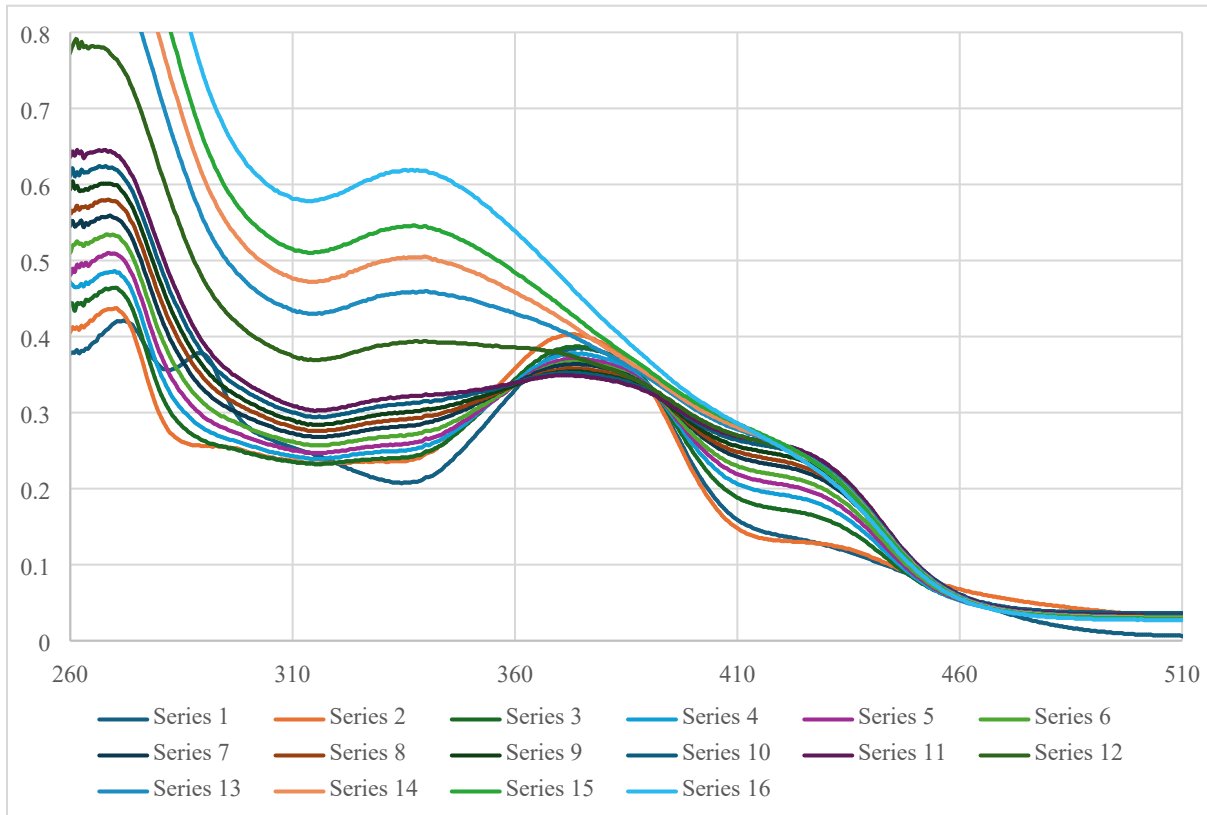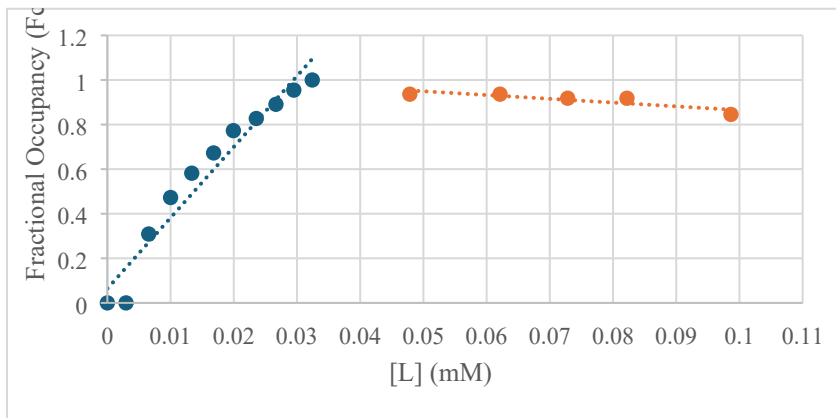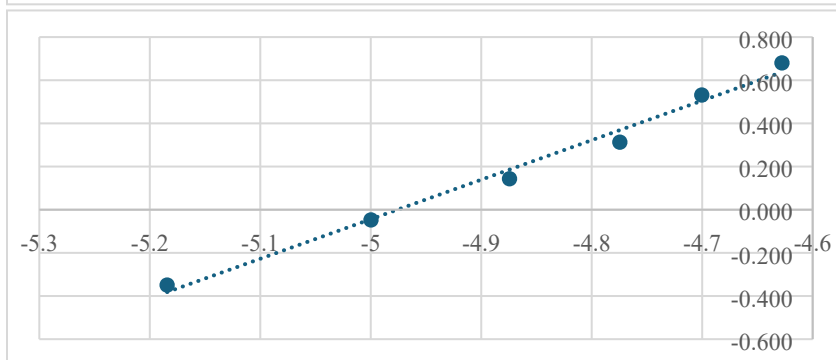

### Syringic Acid – Fe(III) chelation

### Replicate 1

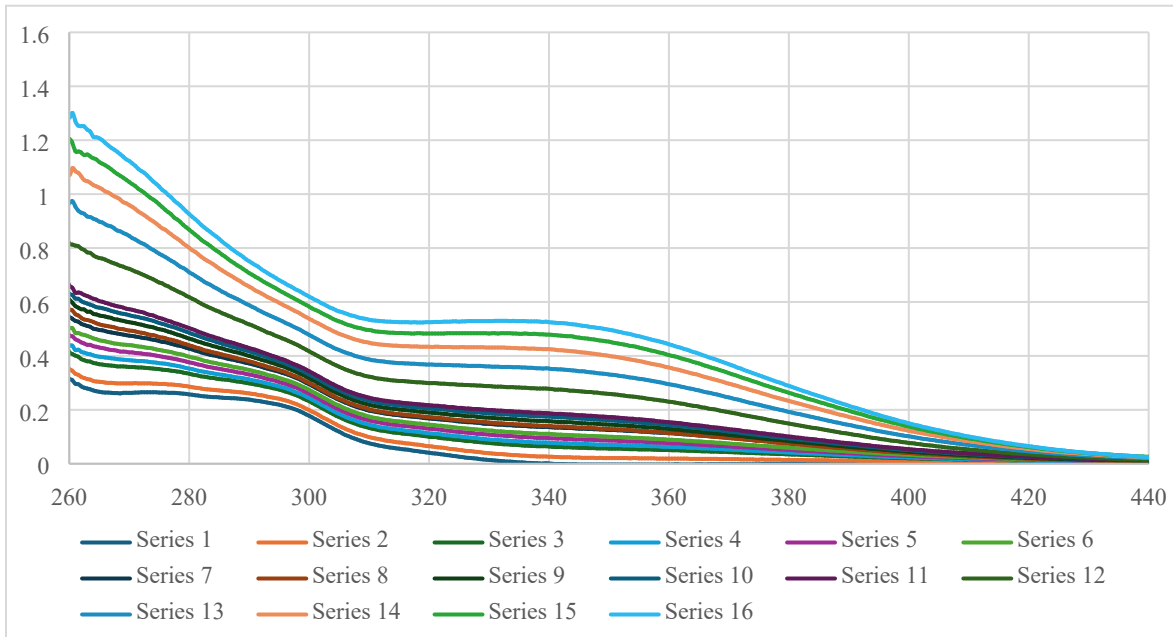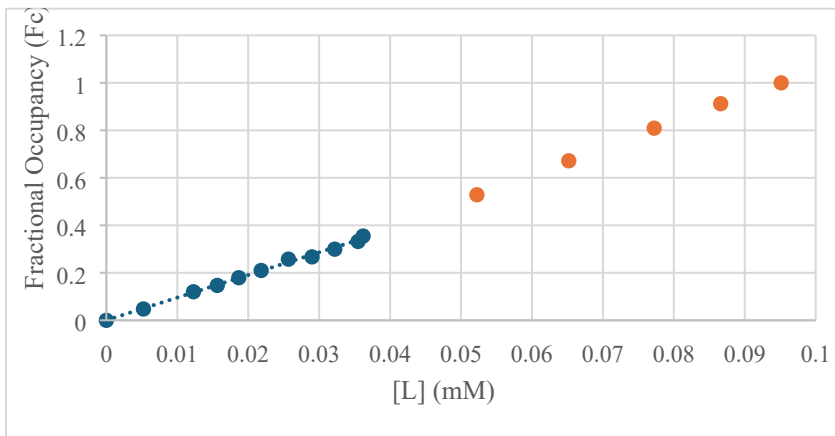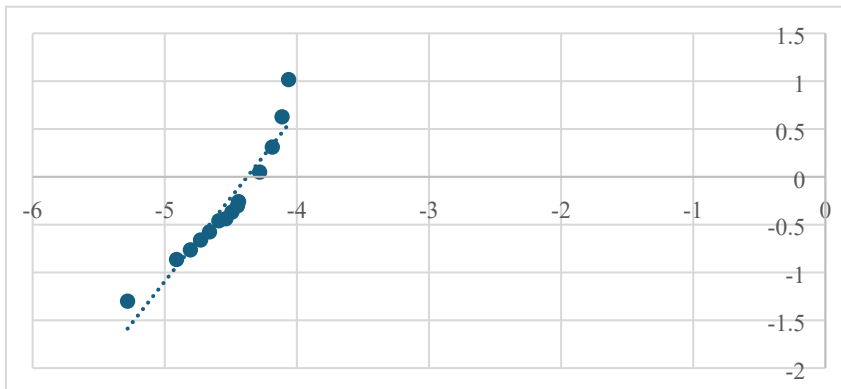

### Replicate 2

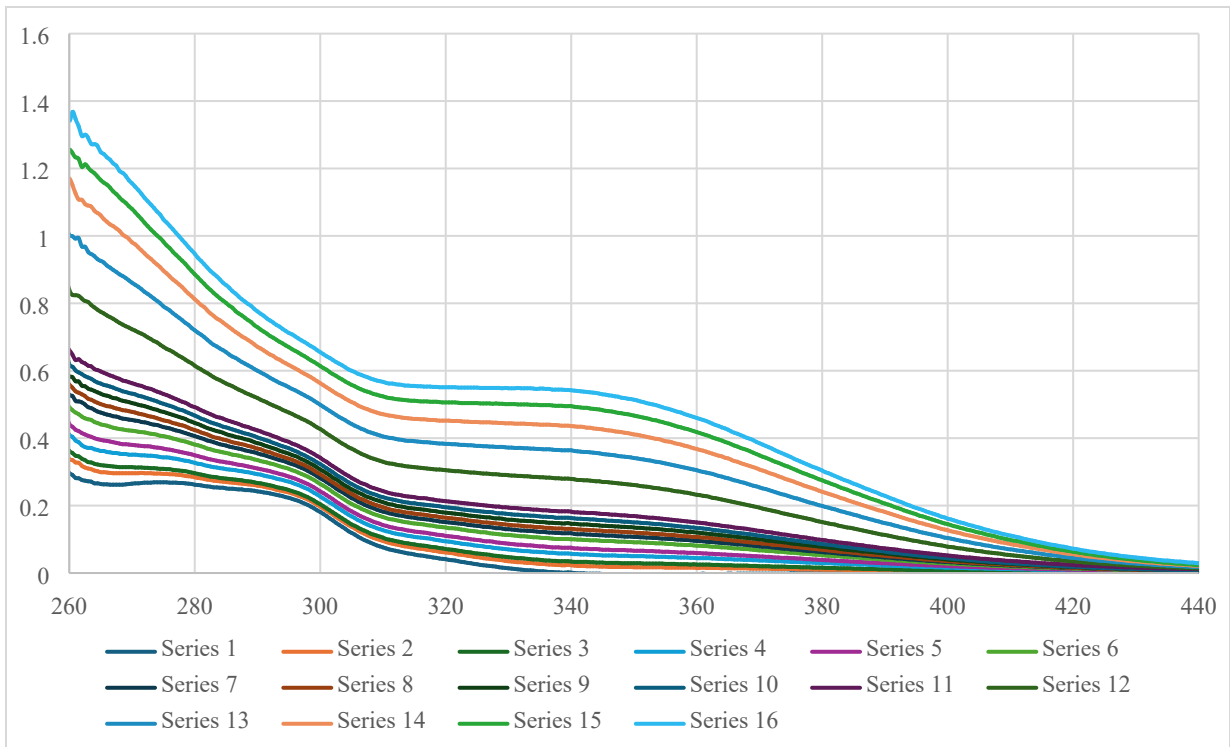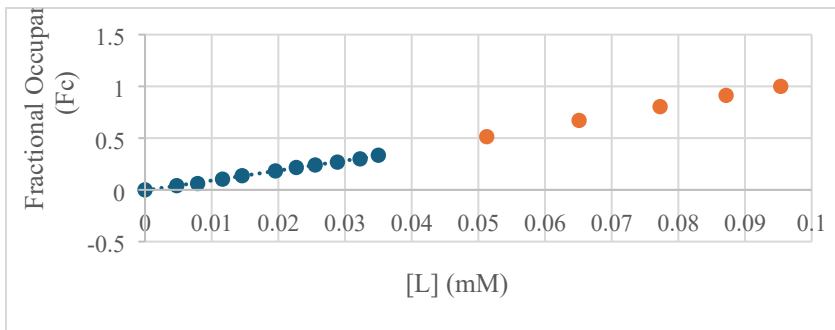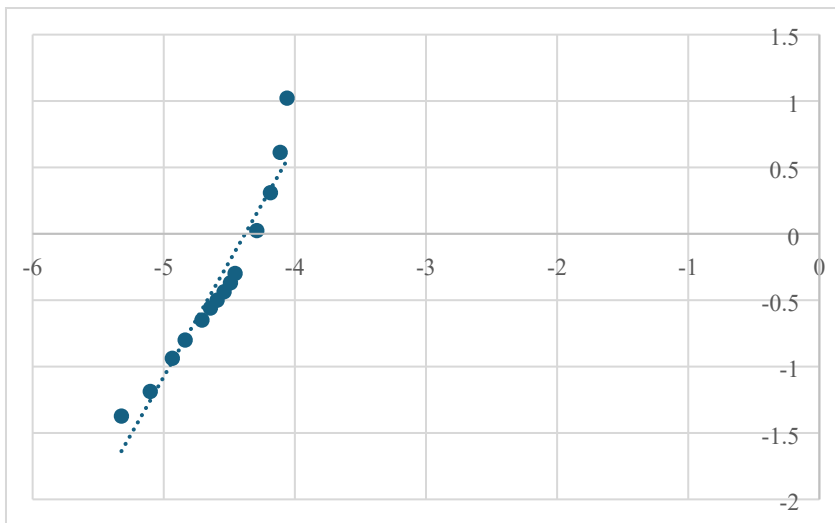

Replicate 3

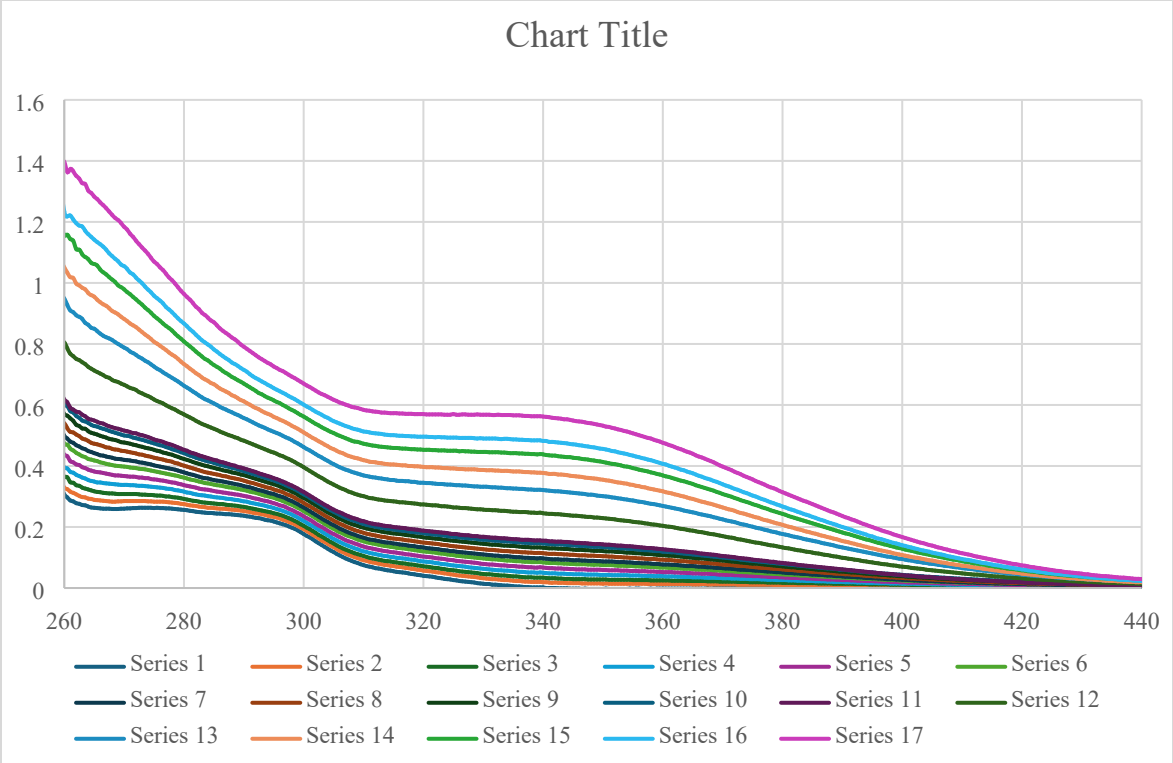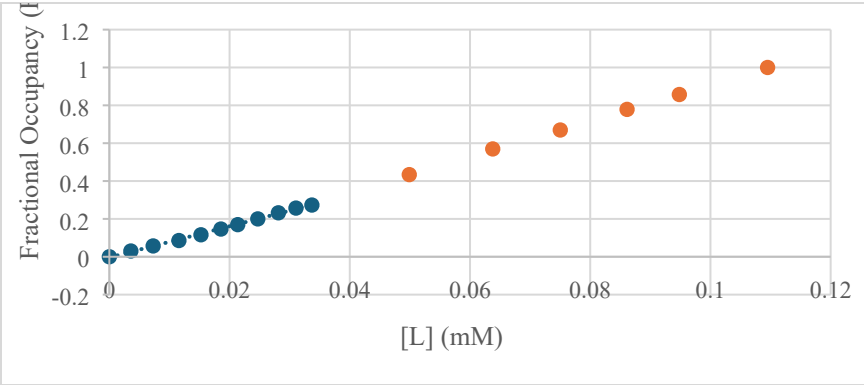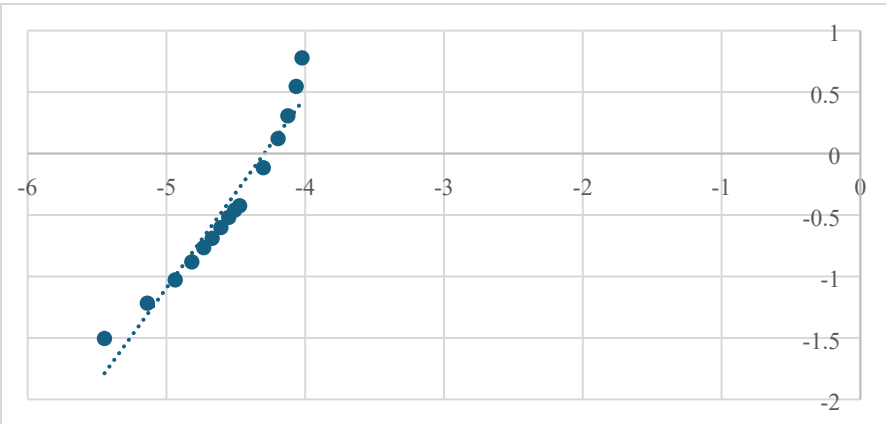

**Caffeic Acid – Fe(II) chelation**

### Replicate 1

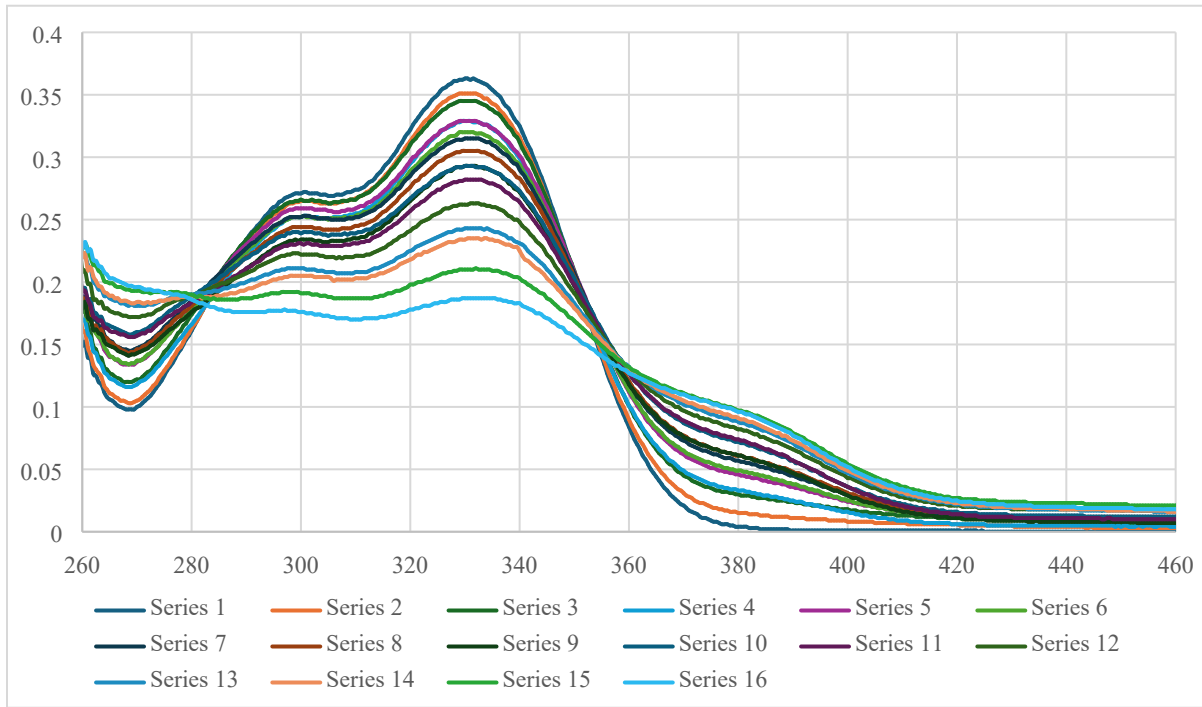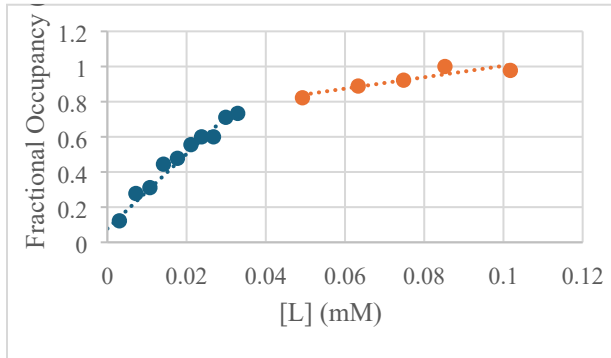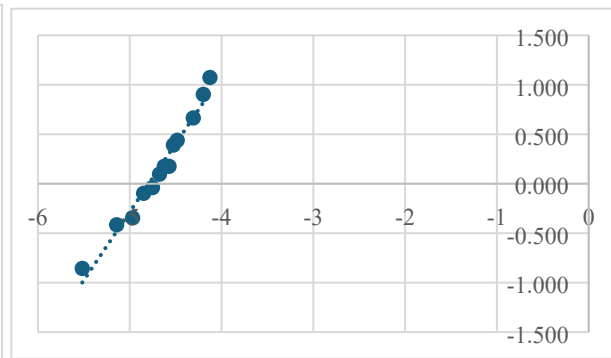

### Replicate 2

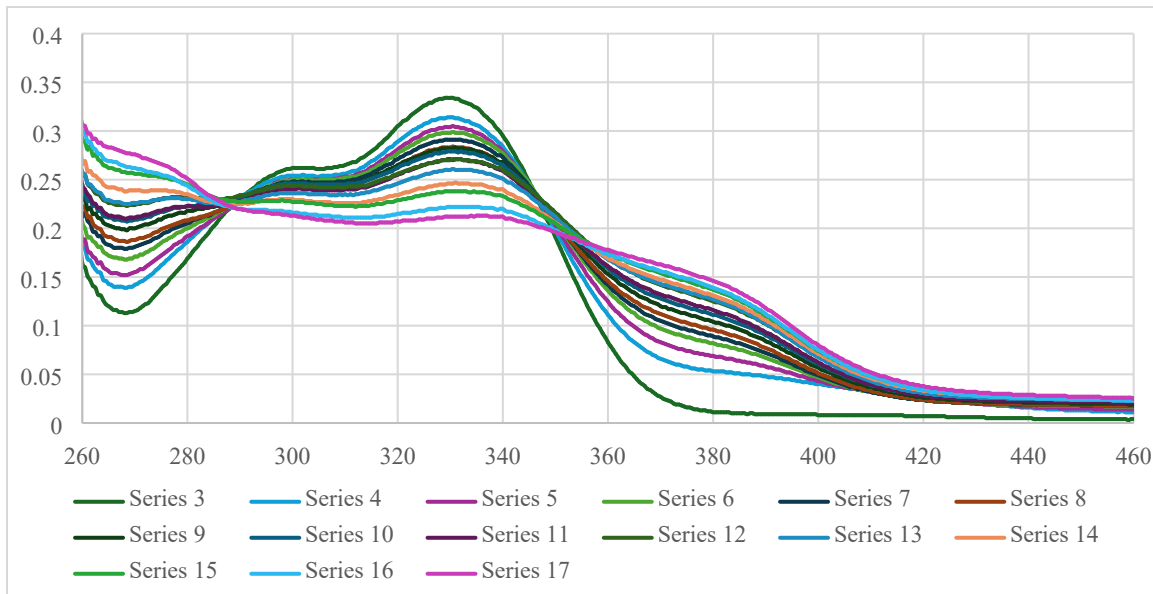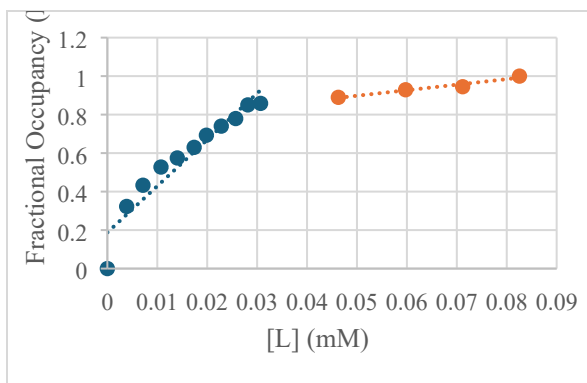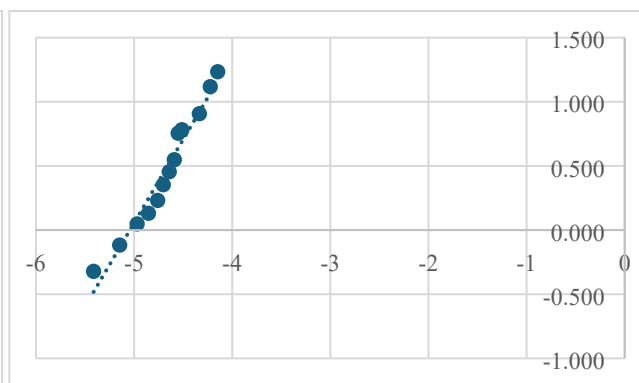

Replicate 3

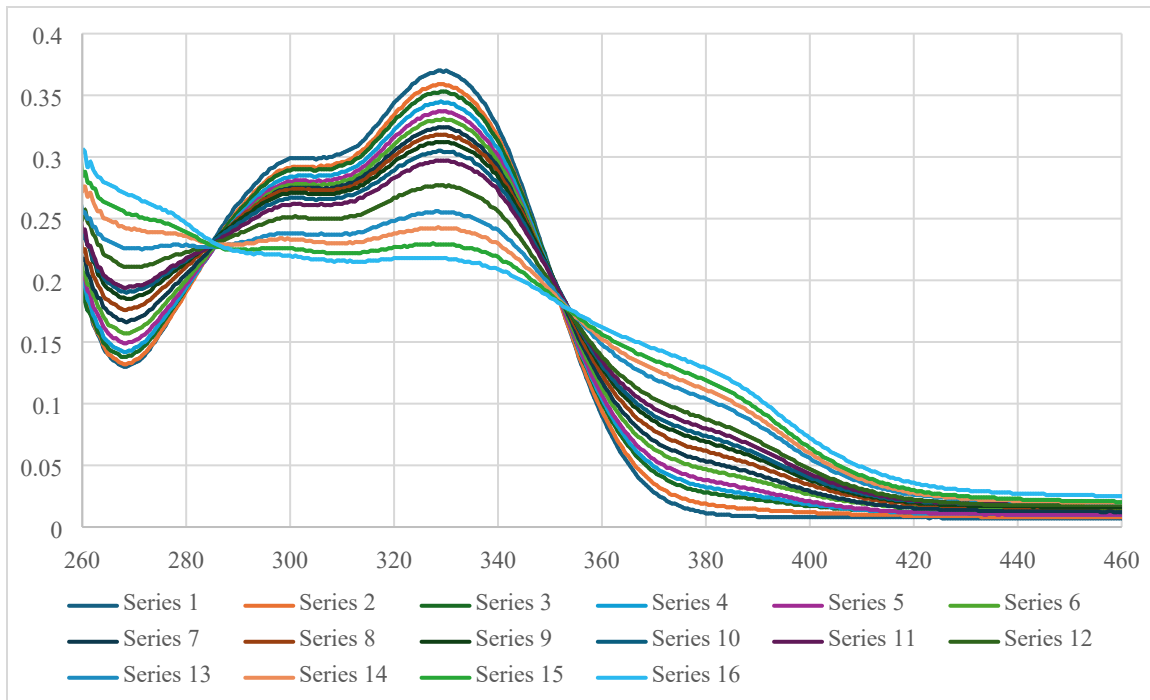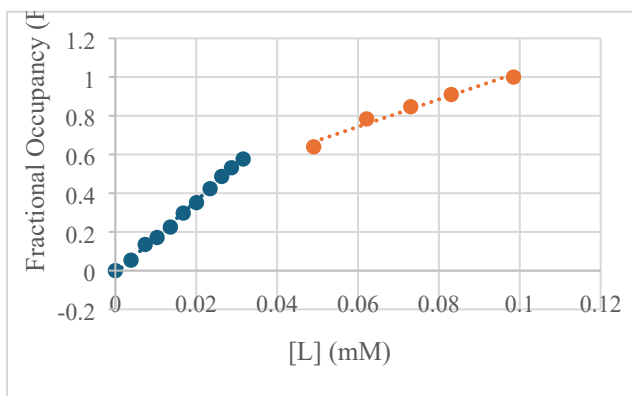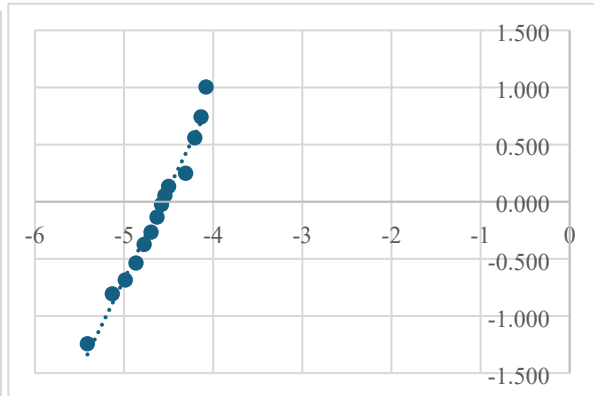

**p-Coumaric Acid – Fe(II) chelation**

Note: For chelation experiments of p-coumaric acid, the absorbance at 314 nm sharply lowered at higher Fe(II) dosages, thereby limiting the calculation of fractional occupancy to the first 3-5 data points.

### Replicate 2

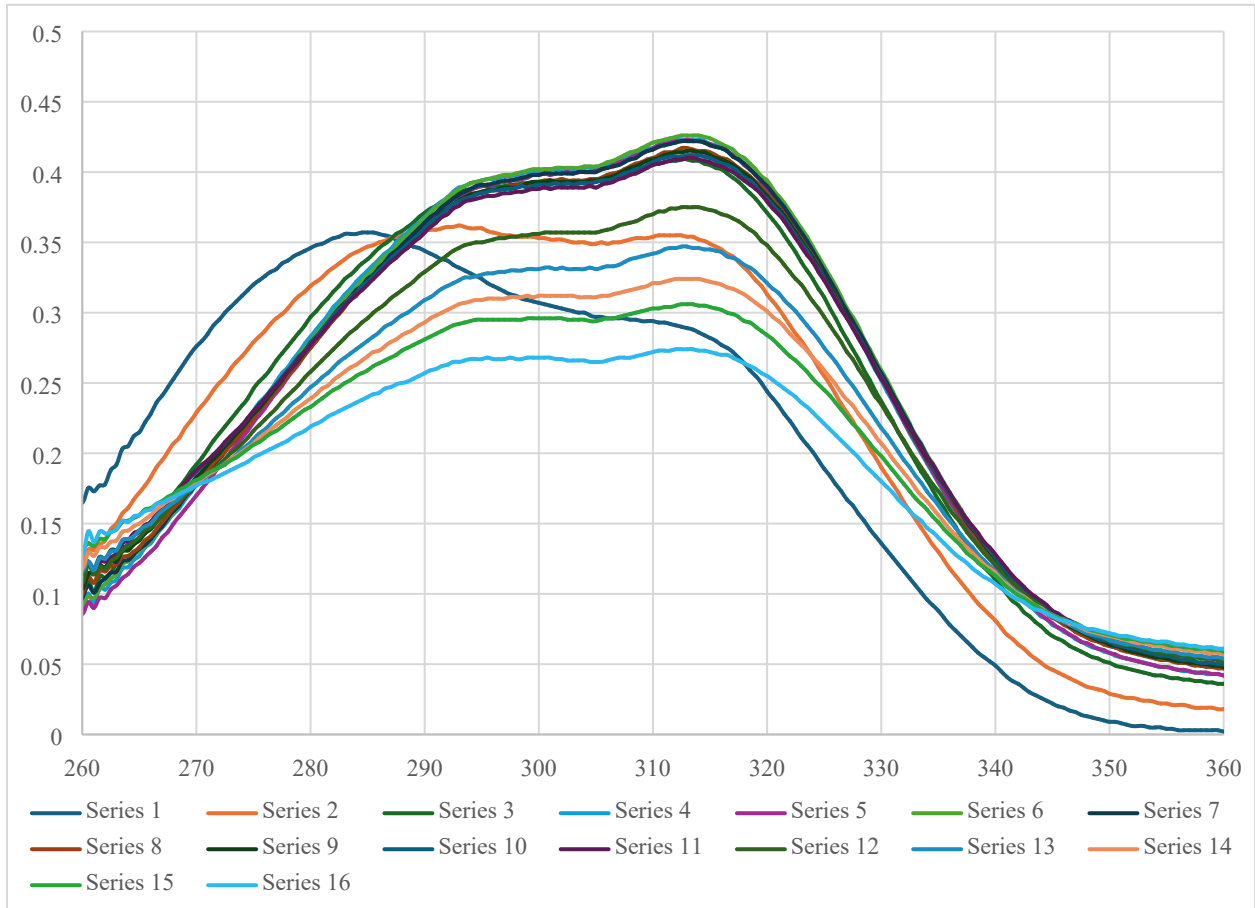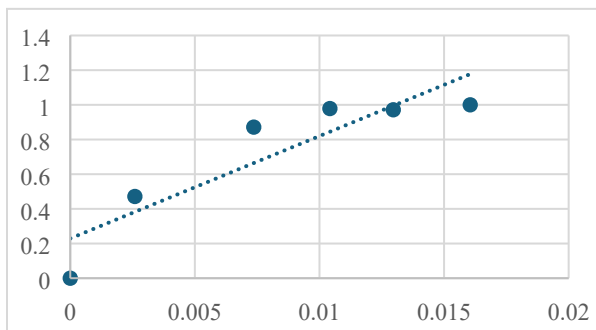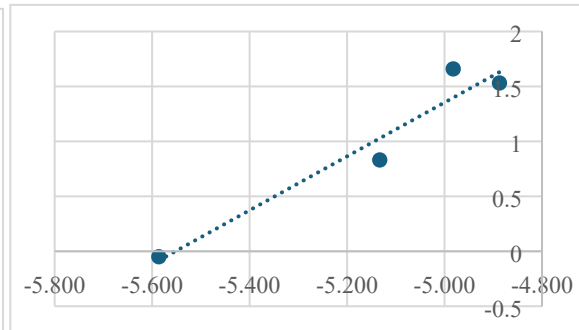

### Replicate 3



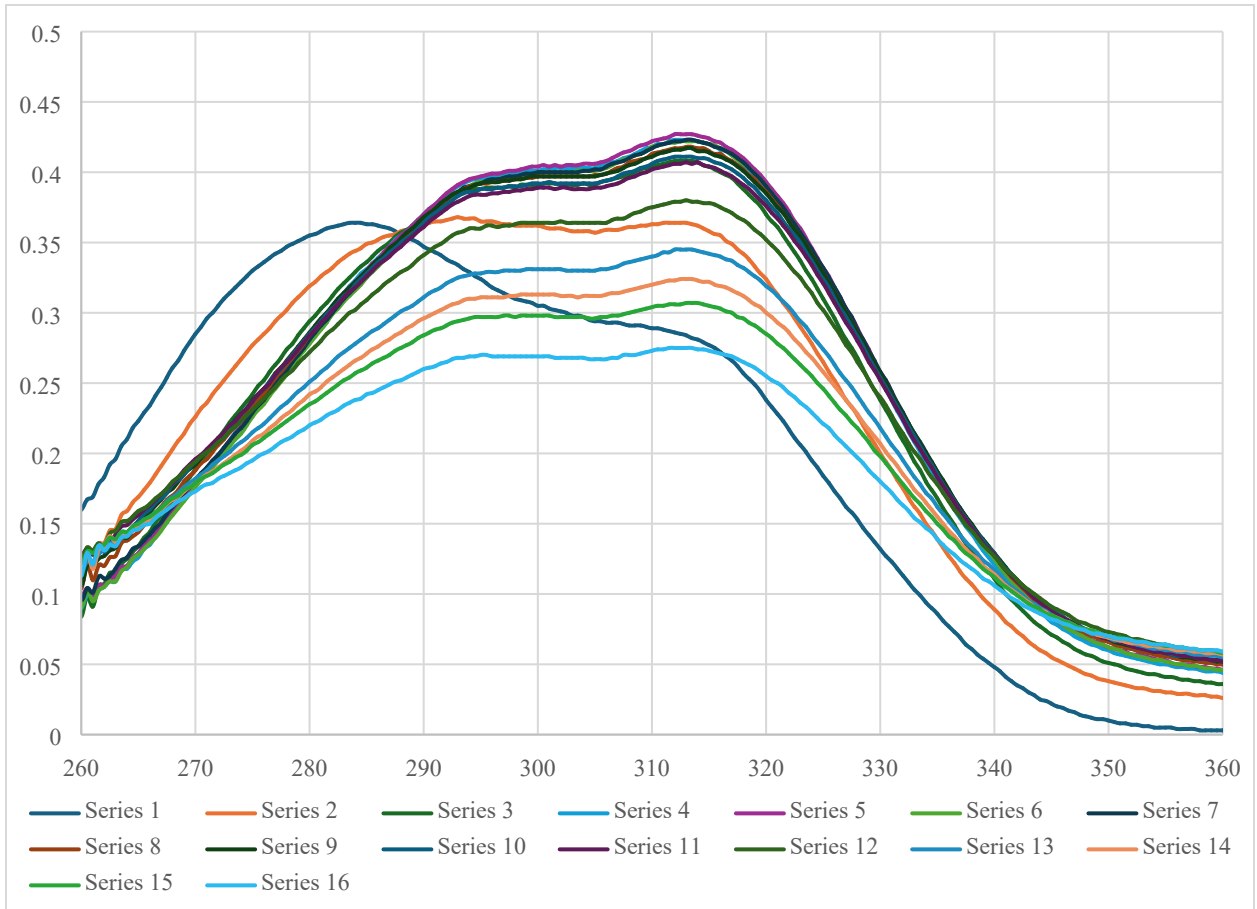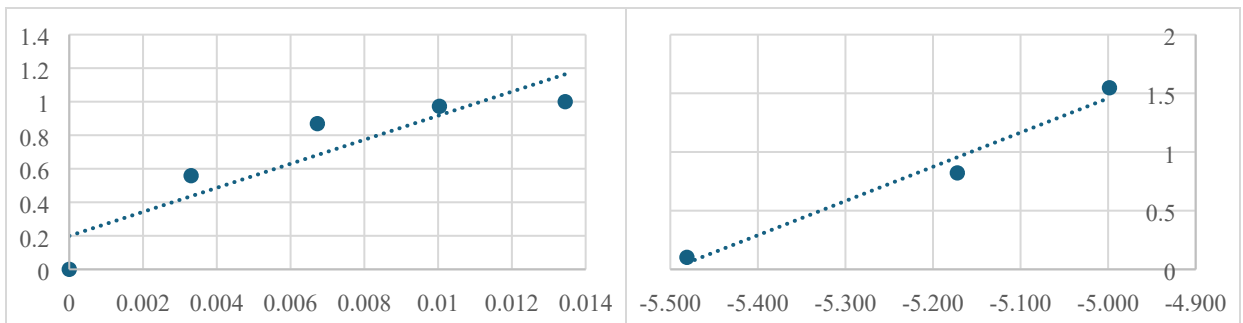

**Summary Table**

| Hill Coefficients            | Fe(II) |       |       |         |         |       | Fe(III) |       |  |
|------------------------------|--------|-------|-------|---------|---------|-------|---------|-------|--|
| Model Compound               | Rep 1  | Rep 2 | Rep 3 | Average | Std Dev | Rep 1 | Rep 2   | Rep 3 |  |
| <i>Myricetin</i>             | 2.836  | 2.388 |       | 2.612   | 0.317   | 2.432 | 1.985   | 1.885 |  |
| <i>Quercetin</i>             | 1.829  | 2.044 | 1.619 | 1.831   | 0.213   | 2.685 | 2.218   | 1.781 |  |
| <i>Kaempferol</i>            | 2.150  | 3.247 | 3.503 | 2.967   | 0.719   | 1.609 | 1.872   | 1.885 |  |
| <i>Syringic Acid</i>         | 0.000  | 0.000 | 0.000 | 0.000   | 0.000   | 1.754 | 1.736   | 1.550 |  |
| <i>Gallic Acid</i>           | 0.000  | 0.000 | 0.000 | 0.000   | 0.000   | 0.000 | 0.000   | 0.000 |  |
| <i>p-Coumaric Acid</i>       |        | 2.452 | 2.917 | 2.684   | 0.329   | 0.000 | 0.000   | 0.000 |  |
| <i>Caffeic Acid</i>          | 1.380  | 1.302 | 1.595 | 1.426   | 0.152   | 0.000 | 0.000   | 0.000 |  |
| <i>Vanillic Acid</i>         | 0.000  | 0.000 |       | 0.000   | 0.000   | 0.000 | 0.000   |       |  |
| <i>Fructose</i>              | 0.000  | 0.000 |       | 0.000   | 0.000   | 0.000 | 0.000   |       |  |
| <i>Arabinose</i>             | 0.000  | 0.000 |       | 0.000   | 0.000   | 0.000 | 0.000   |       |  |
| <i>Xylose</i>                | 0.000  | 0.000 |       | 0.000   | 0.000   | 0.000 | 0.000   |       |  |
| <i>Glucose</i>               | 0.000  | 0.000 |       | 0.000   | 0.000   | 0.000 | 0.000   |       |  |
| <i>Tannic Acid (0.01 mM)</i> | 0.090  | 0.060 |       | 0.075   | 0.021   | 0.002 | 0.002   | 0.000 |  |
